# Supplementary material for: Perception on risk factors of child maltreatment in China: a qualitative study among health professionals
Source: PubMed Central journal article supplement — BMJ Open. 2019 Jun 9;9(6):e029071. doi: 10.1136/bmjopen-2019-029071 (PMC6561447; doi:10.1136/bmjopen-2019-029071), 2019-06-09
Supplement: bmjopen-2019-029071.draft_revisions.pdf [file bmjopen-2019-029071.draft_revisions.pdf]

# BMJ Open

BMJ Open is committed to open peer review. As part of this commitment we make the peer review history of every article we publish publicly available.

When an article is published we post the peer reviewers' comments and the authors' responses online. We also post the versions of the paper that were used during peer review. These are the versions that the peer review comments apply to.

The versions of the paper that follow are the versions that were submitted during the peer review process. They are not the versions of record or the final published versions. They should not be cited or distributed as the published version of this manuscript.

BMJ Open is an open access journal and the full, final, typeset and author-corrected version of record of the manuscript is available on our site with no access controls, subscription charges or pay-per-view fees (<http://bmjopen.bmj.com>).

If you have any questions on BMJ Open's open peer review process please email [info.bmjopen@bmj.com](mailto:info.bmjopen@bmj.com)

# BMJ Open

## The perception on risk factors for child maltreatment in China: A qualitative study among health professionals

|                               |                                                                                                                                                                                                                                                                                                                                                                                                                                                                                                                                                                                                                                                    |
|-------------------------------|----------------------------------------------------------------------------------------------------------------------------------------------------------------------------------------------------------------------------------------------------------------------------------------------------------------------------------------------------------------------------------------------------------------------------------------------------------------------------------------------------------------------------------------------------------------------------------------------------------------------------------------------------|
| Journal:                      | <i>BMJ Open</i>                                                                                                                                                                                                                                                                                                                                                                                                                                                                                                                                                                                                                                    |
| Manuscript ID                 | bmjopen-2019-029071                                                                                                                                                                                                                                                                                                                                                                                                                                                                                                                                                                                                                                |
| Article Type:                 | Research                                                                                                                                                                                                                                                                                                                                                                                                                                                                                                                                                                                                                                           |
| Date Submitted by the Author: | 11-Jan-2019                                                                                                                                                                                                                                                                                                                                                                                                                                                                                                                                                                                                                                        |
| Complete List of Authors:     | Yue, Qing; National Center for Women and Children's Health, Chinese Center for Disease Control and Prevention<br>Wang, Shuo; National Center for Women and Children's Health, Chinese Center for Disease Control and Prevention<br>Wang, Yan; National Center for Women and Children's Health, Chinese Center for Disease Control and Prevention<br>Liu, Wenli; School of Brain and Cognitive Sciences, Beijing Normal University<br>Huang, Xiaoyan; Department of Social Work and Social Policy, Zhou Enlai School of Government,<br>Xu, Tao; National Center for Women and Children's Health, Chinese Center for Disease Control and Prevention, |
| Keywords:                     | China, child maltreatment, risk factor, health professionals                                                                                                                                                                                                                                                                                                                                                                                                                                                                                                                                                                                       |
|                               |                                                                                                                                                                                                                                                                                                                                                                                                                                                                                                                                                                                                                                                    |

SCHOLARONE™  
Manuscripts

1  
2  
3  
4 **The perception on risk factors for child maltreatment in China: A qualitative**  
5 **study among health professionals**  
6  
7  
8  
9

10  
11 Qing Yue<sup>1</sup>, Shuo Wang<sup>1</sup>, Yan Wang<sup>1</sup>, Wenli Liu<sup>2</sup>, Xiaoyan Huang<sup>3</sup>, Tao Xu<sup>1\*</sup>  
12

13  
14 1.Child Health Care Department, National Center for Women and Children's Health,  
15

16  
17 China CDC  
18

19  
20 2.School of Brain and Cognitive Sciences, Beijing Normal University  
21

22  
23 3.Department of Social Work and Social Policy, Zhou Enlai School of Government,  
24

25  
26 Nankai University  
27  
28  
29

30  
31 **Corresponding author:** Dr. Tao Xu, Room 601, No. 12 Da Huisi Rd, Haidian  
32

33 District, Beijing, P.R.China, 100081, Email address: xutao6622@163.com,  
34

35 Tel:86-10-62170921, Fax:86-10-62170900.  
36  
37  
38  
39  
40  
41  
42  
43  
44  
45  
46  
47  
48  
49  
50  
51  
52  
53  
54  
55  
56  
57  
58  
59  
60

## Abstract

**Objectives:** The aim of this study was to explore the perception of risk factors for child maltreatment among health professionals in China.

**Design:** Qualitative research.

**Setting:** The study was conducted in November and December 2014 in Hunan, Zhejiang, Shaanxi and Guangdong province in China.

**Participants:** Five communities in one city and five townships in one county were randomly selected and interviews were conducted in maternal and child health hospitals, children's hospitals, community health service centers and township hospitals in the selected areas. Doctors and nurses engaged in child health care services were approached for in-depth-interview.

**Results:** A total of 95 health professionals were interviewed. From their perspective, risk factors causing child maltreatment might be divided into four domains: 1) Cultural factors, including parents' indisputable authority, and Chinese people's preference for sons; 2) Social factors, including a fast-paced and stressful life, children left behind by migrant worker parents, and abnormal education; 3) Family factors, including economic status, family structure, parents' inability to parent or personality, experience of maltreatment, and parents' illnesses; 4) Children's factors, including age, gender, temper, disabilities, and poor awareness of self-protection.

**Conclusions:** The results indicate that health professionals in China have realized the risk of certain factors leading to child maltreatment; however, some views still require updating. Based on the perfection of health professionals, targeted training courses are needed in order to enable them to correctly identify and deal with suspected cases of child maltreatment.

**Key words:** China; child maltreatment; risk factor; health Professionals

1  
2  
3  
4  
5  
6  
7  
8  
9  
10  
11  
12  
13  
14  
15  
16  
17  
18  
19  
20  
21  
22  
23  
24  
25  
26  
27  
28  
29  
30  
31  
32  
33  
34  
35  
36  
37  
38  
39  
40  
41  
42  
43  
44  
45  
46  
47  
48  
49  
50  
51  
52  
53  
54  
55  
56  
57  
58  
59  
60

For peer review only

## Strengths and limitations of this study

- This study uses qualitative research method to explore the perception of risk factors for child maltreatment among health professionals in China
- This study is an important attempt to carry a step forward towards child maltreatment prevention programs in China.
- This was a limitation that the results of qualitative research might not represent the situation of the whole population.

## Introduction

Child maltreatment constitutes all forms of physical and/or emotional ill treatment, sexual abuse, neglect, negligent treatment, commercial and/or other exploitation that occurs to children under 18 years of age.<sup>1,2</sup> The consequences of child maltreatment are more wide-ranging than death and injury.<sup>3</sup> For instance, child maltreatment has been associated with a myriad of adverse consequences throughout children's lifespan, including harm to the victim's physical and mental health, life quality, well-being and development.<sup>4,5</sup> It also leads to a huge financial burden.<sup>6</sup>

Although most studies on child maltreatment have been conducted in developed countries, child maltreatment is common throughout the entire world.<sup>7,8</sup> In China, child maltreatment was not recognized as a social problem until the early 1990s, but prevalence has been increasing.<sup>9</sup> Although China is a signatory to the UN Convention on the Rights of the Child, neither a formal child protection system nor a network of social services exists to support "at risk" families.<sup>10</sup> A recent literature review reported the prevalence of physical abuse lies between 32.4% and 67.3%, sexual abuse between 10.2% and 25.5%, emotional abuse between 10.6% and 67.1%, and neglect between 22.4% and 54.9% reported by different researchers in China.<sup>11</sup>

1  
2  
3  
4 Health professionals play a key part in identifying, dealing with and reporting  
5 maltreatment cases, as well as providing referrals that can prevent further  
6 maltreatment.<sup>6,12</sup> Given that China has no formalized social services for maltreatment,  
7 the role of health professionals is more vital. Furthermore, under the policy of basic  
8 public health service equalization, public health specialists and community nurses are  
9 responsible for basic clinical services.<sup>13</sup> This gives them more opportunity to find  
10 cases of maltreatment. However, little is known about their knowledge and attitudes.  
11 Preventing child maltreatment requires a diverse approach across different sectors,  
12 and only with knowledge of risk factors can interventions be designed.<sup>1,3</sup> Thus, this  
13 study aimed to explore the perception of risk factors for child maltreatment among  
14 health professionals in China, in order to develop targeted training courses and help  
15 them improve their ability to identify and intervene child maltreatment.  
16  
17  
18  
19  
20  
21  
22  
23  
24  
25  
26  
27

## 28 **Methods**

### 29 *Study setting*

30  
31  
32  
33 The study was conducted in November and December 2014 in Hunan, Zhejiang,  
34 Shaanxi and Guangdong province. Five communities in one city and five townships in  
35 one county were randomly selected and interviews were conducted in maternal and  
36 child health hospitals, children's hospitals, community health service centers and  
37 township hospitals in the selected areas. Doctors and nurses engaged in child health  
38 care services were approached to participate. This study has been reviewed and  
39 approved by Institutional Review Board of National Center for Women and  
40 Children's Health, Chinese Center for Disease Control and Prevention.  
41  
42  
43  
44  
45  
46  
47  
48  
49

### 50 *Sampling procedures*

51  
52  
53 A combination of convenient sampling and sampling with a purpose were  
54 utilized. The first stage involved the selection of key informants. As the second stage,  
55 the start involved a purposeful sample framework including variables such as  
56  
57  
58  
59  
60

1  
2  
3  
4 occupational categories, type of departments, and professional levels. Once the data  
5 was collected, an interpretative framework was constructed. The sampling process  
6 stopped when no new themes emerged and an acceptable interpretative framework  
7 was constructed.  
8  
9  
10

### 11 ***Patient and Public Involvement***

12  
13  
14  
15 This research was done without patient and public involvement.  
16

### 17 ***Data collection***

18  
19  
20 The study collected qualitative data using in-depth interviews. Each interview was  
21 conducted in a private room on a one-to-one basis in the health provider's office or  
22 any other places according to the participant's request. A written consent was  
23 obtained before each interview. The duration of each interview ranged from 45 min to  
24 1.5 h. All interviews were recorded.  
25  
26  
27  
28  
29  
30

### 31 ***Data analysis***

32  
33  
34 MAXQDA (version 11.0) was used to facilitate the data analysis. All interviews were  
35 transcribed by one research staff member and the quality of the transcription was  
36 double-checked by another staff member. The transcripts were coded and analysed by  
37 the first author. After careful and repeated examination of the transcripts, categories  
38 and subcategories of analysis were developed. Totally 24 codes and 11 code families  
39 were created. This made it easier to analyze by individual family code as well as  
40 visualize the relations among codes in a network.<sup>14</sup> A constant comparative method  
41 was employed to facilitate theme development, following recommended steps.<sup>15</sup> All  
42 codes relevant to perceived risk factors were searched and results categories were  
43 determined based on common themes across related codes.  
44  
45  
46  
47  
48  
49  
50  
51  
52  
53

## 54 **Results**

### 55 ***Sample characteristics***



Table 1 summaries the demographic variables of the interviewees. The participants included 95 medical workers, with 40 males and 55 females. Most interviewees were doctors (65.3%). The professionals from general hospitals (32.6%) were almost as many as those from maternal and child health hospitals (33.7%). As for professional titles, most interviewees held senior titles (47.4%).

Table 1 Demographic characteristic of health professionals

|                                    | Male<br>(n=40) | Female<br>(n=55) | Total<br>(n=95) | %    |
|------------------------------------|----------------|------------------|-----------------|------|
| <b>Province</b>                    |                |                  |                 |      |
| Zhejiang                           | 10             | 14               | 24              | 25.3 |
| Guangdong                          | 12             | 12               | 24              | 25.3 |
| Shanxi                             | 10             | 13               | 23              | 24.2 |
| Hunan                              | 8              | 16               | 24              | 25.3 |
| <b>Hospital level</b>              |                |                  |                 |      |
| General hospital                   | 11             | 20               | 31              | 32.6 |
| Children's hospital                | 1              | 1                | 2               | 2.1  |
| Maternal and child health hospital | 16             | 16               | 32              | 33.7 |
| Community health service Center    | 7              | 15               | 22              | 23.2 |
| Township hospital                  | 5              | 3                | 8               | 8.4  |
| <b>Occupational category</b>       |                |                  |                 |      |
| Doctors                            | 25             | 37               | 62              | 65.3 |
| Nurses                             | 0              | 9                | 9               | 9.5  |
| Managers                           | 15             | 9                | 24              | 25.3 |
| <b>Professional level</b>          |                |                  |                 |      |

|              |    |    |    |      |
|--------------|----|----|----|------|
| Senior       | 20 | 25 | 45 | 47.4 |
| Intermediate | 14 | 18 | 32 | 33.7 |
| Primary      | 6  | 12 | 18 | 18.9 |

### ***Risk factors for child maltreatment***

Analysis of the interview transcriptions yielded four primary themes relevant to risk factors for child maltreatment: (a) cultural factors; (b) social factors; (c) family factors; and (d) children's own factors. These four primary themes were divided into sub-themes to elucidate pertinent aspects (see Fig. 1).

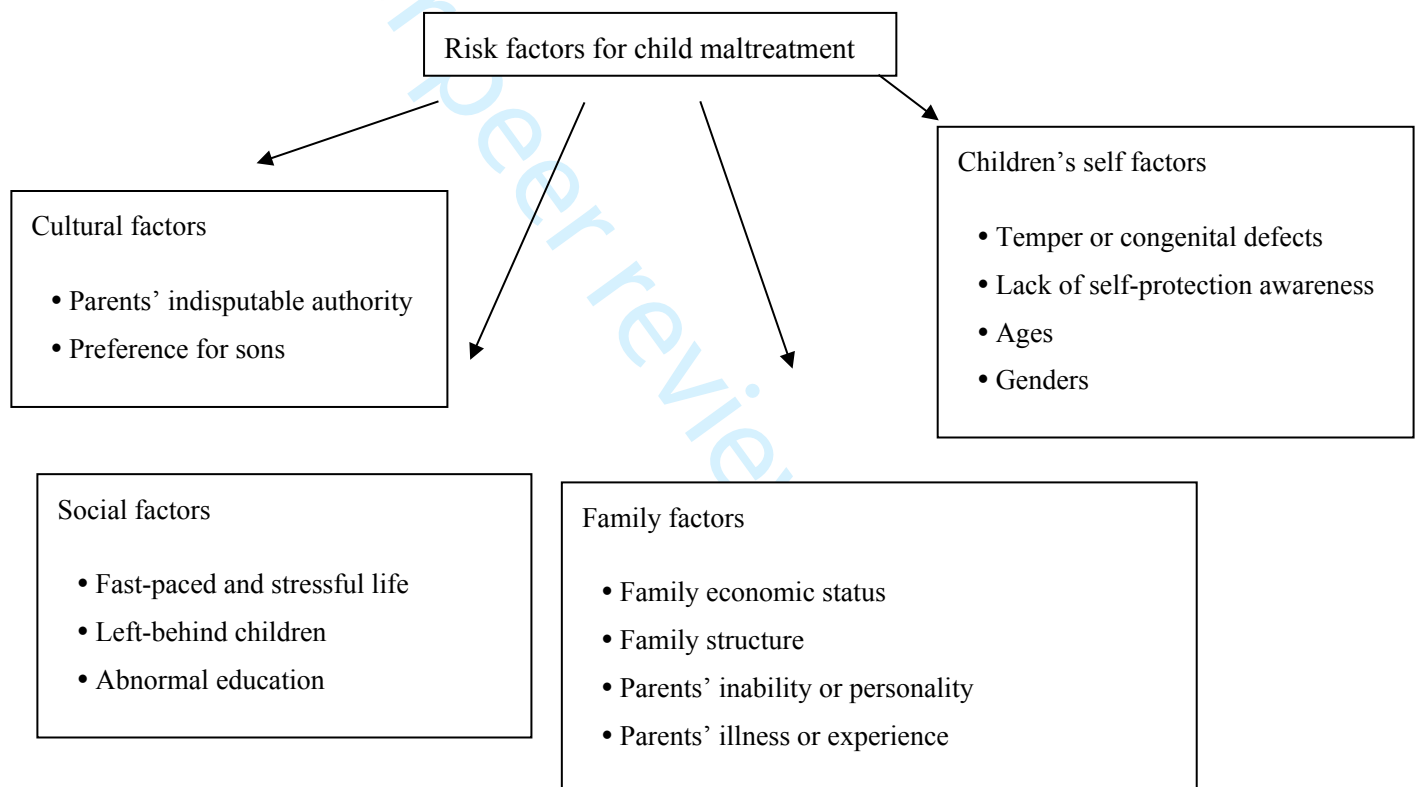

Fig. 1 Primary themes with sub-themes

### **Cultural factors**

In Chinese traditional culture, parents have indisputable authority and children's disobedience is strictly forbidden. Under the influence of some typical Chinese

1  
2  
3  
4 traditional phrases, such as “Spare the rod and spoil the child”, parents tend to beat  
5  
6 their children at will.

7  
8 Influenced by the utilitarian climate, many parents keep up with the Joneses by  
9  
10 setting unreasonable expectations and demands for their children, and physically  
11  
12 punish their child if they fail to meet these expectations.

13  
14  
15 *Some parents’ expectations for their children are too high. They feel*  
16  
17 *disappointed, which causes physical abuse. (Community health worker, female, aged*  
18  
19 *28)*

20  
21  
22 The traditional preference for sons in China leads to maltreatment of girls,  
23  
24 including physical abuse and neglect.

25  
26  
27 *People living in remote or mountainous areas prefer boys to girls. Contrary to*  
28  
29 *their expectation, they give birth to girls, resulting in tendency to neglect . (Doctor in*  
30  
31 *child hospital, male, aged 35)*

### 32 33 **Social factors**

34  
35  
36 The pace of life in modern China is much faster than before, and citizens bear  
37  
38 heavy life stress as China’s society moves towards a highly commercial one. Parents  
39  
40 have relatively limited time and patience to take care of their children.

41  
42  
43 *Most parents working in cities or farming in rural areas have limited time and*  
44  
45 *energy. (Community health worker, female, aged 36)*

46  
47  
48 Some children are left in the care of grandparents or other relatives when their  
49  
50 parents migrate to the cities for work. These children are more likely to suffer from  
51  
52 maltreatment.

53  
54  
55 *Most of them are taken care of by their grandparents, and comparatively can’t*  
56  
57 *be supervised effectively. (Community health worker, male, aged 38)*

## Family factors

Families' economic status may exert great impact on children's well-being. Child maltreatment happens relatively more frequently in families with poor economic conditions. Children of single parents or in combined families tend to be at greater risk of maltreatment.

Education also plays a large role. As some parents lack parenting skills, they think only physical punishment will make children more obedient.

*Many of these parents believe children tend to remember what parents say after being beat rather than reasoning. (Doctor in maternal and child health care center, male, aged 30)*

Maltreatment is more likely to be committed by parents suffering from mental health issues, and parents who experienced maltreatment themselves when they were young.

*As he [the father] was maltreated himself, he copies this behavior to his child. (Nurse in child hospital, female, aged 35)*

## Children's own factors

Children who are mischievous, bad-tempered or congenitally handicapped are more likely to suffer from maltreatment.

*Sometimes it's because the child is too naughty. They are prone to being maltreated if they have congenital defects. Another issue is the intelligence of children. (Hospital manager in maternal and child health care center, male, aged 41)*

Some interviewees mentioned that children's lack of self-protection awareness, and even being completely unaware of being maltreated, increases the risk of maltreatment for the child.

1  
2  
3  
4 Children of different genders are differently at risks for maltreatment. Girls are  
5 more likely to suffer from maltreatment, except when children have disabilities, in  
6 which case both genders are equally at risk.  
7  
8

9  
10 *I think girls are more likely to suffer from sexual abuse and neglect than boys.*

11  
12  
13 *For children with congenital defects, the possibilities for boys and girls are more or*  
14 *less the same. (Manager in community health care center, female, aged 40)*  
15

## 16 17 **Discussion**

18  
19  
20 Our study identified the risk factors for child maltreatment in China as perceived  
21 by health professionals. Given their unique roles with children and families, health  
22 professionals should be alerted to risk factors that may suggest suspected cases. There  
23 is a direct association between the act of reporting cases and matters related to  
24 knowledge.<sup>16</sup> We found that in the view of Chinese health professionals, many factors  
25 might increase the risk of child maltreatment, including cultural, social, family factors  
26 and those of the children's itself.  
27  
28  
29  
30  
31  
32  
33

### 34 35 **Cultural factors**

36  
37  
38 Cultural factors are very important in understanding child abuse. In Chinese  
39 tradition, the experience of deliberately inflicted pain is regarded as  
40 character-building.<sup>17</sup> Chinese people seem to be less critical of the use of physical  
41 force by parents to accomplish desired ends.<sup>18</sup> The traditional value of filial piety  
42 (*Xiao*) gives parents indisputable authority. This is why children's disobedience  
43 toward parents is the most common reason for maltreatment.<sup>19</sup> Additionally, under the  
44 one-child policy launched in 1979, Parents tend to attach higher value and put greater  
45 expectations on children, and punish them once the expectations fail to be met.<sup>20</sup>  
46  
47  
48  
49  
50  
51  
52  
53

54  
55 In China, conventional wisdom that sons are preferable to daughters is embedded  
56 within patrilineal family structures.<sup>21</sup> Although the inherent son preference is on  
57 decline, sons are still desired more frequently than daughters.<sup>22</sup> Deep-rooted  
58  
59  
60

1  
2  
3  
4 Confucian values play a part.<sup>23</sup>  
5

### 6 **Social factors** 7

8  
9 With rapid economic development in China, the pace of life and stress on  
10 parents have increased, which negatively affect parenting practices.<sup>9</sup> The abnormal  
11 education was regarded as a factor, as it weakens children's ability to protect  
12 themselves. As the health professionals provide care for children regularly, it would  
13 be helpful if they take the responsibility of improving children's ability.  
14  
15  
16  
17  
18

19  
20 The respondents have also recognized the children who are left behind when  
21 their parents go to work in cities. This is consistent with many studies exploring the  
22 influence of rural-to-urban labor migration.<sup>24</sup> With the processes of modernization  
23 and urbanization, many children are left behind, and should be given special attention.  
24  
25  
26  
27

### 28 **Family factors** 29

30  
31 The interviewees perceived low family economic status as a risk factor, which  
32 can affect the parent-child relationships by limiting economic resources and  
33 increasing parents' stress levels.<sup>9</sup> Instances of single parent families and combined  
34 families have been increasing in China. The financial stresses of being a single parent,  
35 and social stresses due to isolation and a lack of social support all play a part in the  
36 increased risk in single parent families.<sup>25</sup> When a single parent remarries, children  
37 may have difficulties in dealing with relationships with new family members, putting  
38 them at an increased risk of maltreatment. In keeping with other studies, we found  
39 that a number of characteristics, including lack of skills, patience or responsibility,  
40 were linked to child abuse. Parents with low education levels were reported to present  
41 a 5-fold increase in risk.<sup>25</sup> Parents more likely to abuse children physically tend to  
42 have poor control of their impulses and mental health problems.<sup>8</sup> All this indicated the  
43 necessity of education aimed at parents. This study, like many previously, reported a  
44 greater risk for parents with a history of childhood abuse. However, a supportive  
45  
46  
47  
48  
49  
50  
51  
52  
53  
54  
55  
56  
57  
58  
59  
60

1  
2  
3 relationship may help those parents break out of this cycle.<sup>26</sup> Health professionals  
4 need to make effort to build such supportive relationships .  
5  
6  
7

### 8 **Children's self factors**

9

10  
11 It is clear that children are victims, and cannot be blamed for the maltreatment  
12 suffered. However, children with several characteristics are more prone to  
13 maltreatment, including physical or mental handicaps, premature birth or with  
14 low-birth weight, or those attachment and bonding was disrupted at a young age.<sup>25</sup>  
15 While health professionals didn't mention the latter two, they did identify poor  
16 awareness of self-protection and children's character. This indicates that some health  
17 professionals maybe blame children instead of perpetrators and show tolerance.  
18  
19  
20  
21  
22  
23  
24

25  
26 Older children were thought to be at greater risk. The United States, however,  
27 have identified younger children to be most vulnerable.<sup>27</sup> Age difference among  
28 studies may have some impact, and our interviewees didn't identify an accurate age  
29 group. As academic performance in school is highly valued in China, school-age  
30 children may be more vulnerable.  
31  
32  
33  
34  
35

36 It has been a consensus that girls are at higher risk for sexual abuse, emotional  
37 abuse and neglect, whereas boys are more likely to be victims of physical abuse in  
38 many countries.<sup>8</sup> Wide cultural gaps exist between different societies and studies in  
39 China produced mixed findings, with boys being more likely to experience both  
40 physical and emotional abuse.<sup>9</sup> Boys may be at greater risk as they are perceived as  
41 inherently having greater responsibility for social obligations, support for parents and  
42 preserving family heritage.<sup>26</sup> However, health professionals failed to realize the risk  
43 of boys' abuse. Further research is still needed to validate the gender differences.  
44  
45  
46  
47  
48  
49  
50  
51  
52  
53  
54  
55  
56  
57  
58  
59  
60

### 56 **Conclusion**

1  
2  
3  
4 This study is an attempt to carry a step forward in terms of training health  
5 professionals in China. Training is required to increase knowledge of health  
6 professionals in order to help them understand the cause of child maltreatment and  
7 meet the qualifications to practice prevention and treatment of child maltreatment.  
8 Our study explored the insight views of health professionals and provide bases for  
9 developing targeted training courses.  
10  
11  
12  
13  
14

### 15 16 **Acknowledgements**

17  
18  
19 This study was accepted for oral presentation in the 2015 ISPCAN Asia Pacific  
20 Regional Conference on Child Abuse and Neglect. We are grateful to Ms. CaiYue and  
21 Chen Xuemei from UNICEF for providing technical support. We also thank all the  
22 health workers who participated in this study. We thank Ms. Margaux Schreurs for  
23 the help with editing the language.  
24  
25  
26  
27  
28

### 29 **Contributors' Statement**

30  
31  
32 The research design, data analysis and manuscript of this study were completed by  
33 TX and QY. The interview was completed by SW, YW, WL and XH. All authors  
34 approved the final manuscript as submitted and agree to be accountable for all aspects  
35 of the work.  
36  
37  
38  
39  
40

### 41 **Competing interests**

42  
43  
44 None declared.  
45  
46

### 47 **Funding**

48  
49 The study was funded by UNICEF Beijing Office.  
50  
51

### 52 **Data sharing statement**

53  
54  
55 The data set is available on request from the corresponding author.  
56  
57  
58  
59  
60



## References

1. World Health Organization. Child maltreatment. [http:// www.who.int/mediacentre/ factsheets/fs150/en/](http://www.who.int/mediacentre/factsheets/fs150/en/).2014, WHO. Geneva.
2. World Health Organization. Report of the Consultation on Child Abuse Prevention. 1999, WHO. Geneva.
3. World Health Organization & ISPCAN. Preventing child maltreatment: a guide to taking action and generating evidence. 2006, WHO, Geneva.
4. Kiser LJ, Stover CS, NavaltaCP, Dorado J, Vogel JM, Abdul-AdilJK, Kim S, Lee RC, Vivrette R, Briggs EC. Effects of the child-perpetrator relationship on mental health outcomes of child abuse: It's (not) all relative. *Child Abuse & Neglect*, 2014; 38:1083-1093.
5. Sidebotham P, Heron J; ALSPAC Study Team. Child maltreatment in the "children of the nineties:" the role of the child. *Child Abuse Negl*, 2003;27:337-352.
6. Pietrantonio AM, Wright E, Gibson KN, Alldred T, Jacobson D, Niec A. Mandatory reporting of child abuse and neglect: Crafting a positive process for health professionals and caregivers. *Child Abuse & Neglect*, 2013;37:102-109.
7. Jui-Ying Feng, Murray Levine. Factors associated with nurses' intention to report child abuse: A national survey of Taiwanese nurses. *Child Abuse & Neglect*, 2005; 29:783–795.
8. Etienne G, Krug, Linda L. Dahlberg, James A. Mercy, Anthony B. Zwi, Rafael Lozano. World report on violence and health. 2002, WHO, Geneva.

- 1  
2  
3  
4 9. Minli Liao, Alvin Shiulain Lee, Amelia C. Roberts-Lewis, Jun Sung Hong, Kaishan  
5  
6 Jiao. Child maltreatment in China: An ecological review of the literature.  
7  
8  
9 Children and Youth Services Review, 2011;33:1709-1719.  
10  
11  
12 10. Hesketh T, Hong ZS, Lynch MA. Child abuse in China: the views and  
13  
14 experiences of child health professionals. Child Abuse & Neglect, 2000;24:867-872.  
15  
16  
17 11. Xu Tao, Jiao Fuyong, Pan Jianping, Chen Jingqi, Huang Xiaoyan, Liu Wenli,  
18  
19 Gong Limin, Wang Huishan. A systematic literature review of child maltreatment in  
20  
21 China (in Chinese). Chinese journal of child health care, 2014;22: 972-975.  
22  
23  
24 12. Wekerle C. Resilience in the context of child maltreatment: Connections to  
25  
26 practice. Child Abuse & Neglect, 2013;37:93-101.  
27  
28  
29 13. Wang J, Kushner K, Frey JJ 3rd, Ping Du X, Qian N. Primary care reform in the  
30  
31 Peoples' Republic of China: implications for training family physicians for the  
32  
33 world's largest country. Fam Med, 2007;39:639-643.  
34  
35  
36 14. Li L, Sun S, Wu Z, Wu S, Lin C, Yan Z. Disclosure of HIV status  
37  
38 isafamilymatter: fieldnotesfromChina. J Fam Psychol, 2007;21:307-314.  
39  
40  
41 15. Dye JF, Schatz I M, Rosenberg BA, & Coleman S T. Constant comparison  
42  
43 method: A kaleidoscope of data. PracticingQualitative Research. 2000.  
44  
45  
46 16. Moreira GA, Vieira LJ, Deslandes SF, Pordeus MA, Gama Ida S, Brilhante AV.  
47  
48 Factors associated with the report and adolescent abuse in primary healthcare.  
49  
50 CienSaude Colet, 2014;19:4267-4276.  
51  
52  
53 17. Wu DYH. Child abuse in Taiwan. In J. E. Korbin (Ed.), Child abuse and neglect:  
54  
55 Cross-cultural perspectives. Berkeley, CA: University of California Press. 1981;139–  
56  
57  
58  
59  
60

1  
2  
3  
4 165.  
5

6 18. George K. HONG, Lawrence K. HONG. Comparative perspectives on child abuse  
7 and neglect: Chinese versus Hispanics and Whites. *Child Welfare*, 1991;70:463-475.  
8  
9

10 19. Leung PW, Wong WC, Chen WQ, Tang CS. Prevalence and determinants of child  
11 maltreatment among high school students in Southern China: A large-scale  
12 school based survey. *Child and Adolescent Psychiatry and Mental Health*,  
13 2008;2:27-48.  
14  
15

16 20. Hua J, Mu Z, Nwaru BI, Gu G, Meng W, Wu Z. Child neglect in one-child  
17 families from Suzhou City of mainland China. *BMC Int Health Hum Rights*,  
18 2014;14:8.  
19  
20

21 21. Murphy R, Tao R, Lu X. Son preference in rural China: patrilineal families and  
22 socioeconomic change. *Popul Dev Rev*, 2011;37:665-690.  
23  
24

25 22. Zhou C, Wang XL, Zhou XD, Hesketh T. Son preference and sex-selective  
26 abortion in China: informing policy options. *Int J Public Health*, 2012;57: 459-465.  
27  
28

29 23. Das Gupta M, Jiang L, Xie Z, Li B, Woojin C, Bae H. Why is son preference so  
30 persistent in East and South Asia? A cross-country study of China, India and the  
31 Republic of Korea. *J Dev Stud*, 2003; 40:153–187.  
32  
33

34 24. Wang X, Ling L, Su H, Cheng J, Jin L, Sun YH. Self-concept of left-behind  
35 children in China: a systematic review of the literature. *Child Care Health Dev*,  
36 2015;41(3):346-55.  
37  
38

39 25. Sidebotham P, Heron J; ALSPAC Study Team. Child maltreatment in the  
40 “children of the nineties”: A cohort study of risk factors. *Child Abuse Negl*, 2006;30:  
41 497-522.  
42  
43  
44  
45  
46  
47  
48  
49  
50  
51  
52  
53  
54  
55  
56  
57  
58  
59  
60

1  
2  
3  
4 26. Klevens J, Bayón MC, Sierra M. Risk factors and context of men who  
5  
6 physically abuse in Bogotá, Colombia. Child Abuse Negl, 2000;24:323-332.  
7

8  
9 27. U.S. Department of Health and Human Services, Administration on Children, &  
10  
11 Youth and Families. Child maltreatment 2006.  
12  
13

14  
15  
16  
17  
18  
19  
20  
21  
22  
23  
24  
25  
26  
27  
28  
29  
30  
31  
32  
33  
34  
35  
36  
37  
38  
39  
40  
41  
42  
43  
44  
45  
46  
47  
48  
49  
50  
51  
52  
53  
54  
55  
56  
57  
58  
59  
60

For peer review only

# BMJ Open

## The perception on risk factors for child maltreatment in China: A qualitative study among health professionals

|                                 |                                                                                                                                                                                                                                                                                                                                                                                                                                                                                                                                                                                                                                                    |
|---------------------------------|----------------------------------------------------------------------------------------------------------------------------------------------------------------------------------------------------------------------------------------------------------------------------------------------------------------------------------------------------------------------------------------------------------------------------------------------------------------------------------------------------------------------------------------------------------------------------------------------------------------------------------------------------|
| Journal:                        | <i>BMJ Open</i>                                                                                                                                                                                                                                                                                                                                                                                                                                                                                                                                                                                                                                    |
| Manuscript ID                   | bmjopen-2019-029071.R1                                                                                                                                                                                                                                                                                                                                                                                                                                                                                                                                                                                                                             |
| Article Type:                   | Research                                                                                                                                                                                                                                                                                                                                                                                                                                                                                                                                                                                                                                           |
| Date Submitted by the Author:   | 15-Mar-2019                                                                                                                                                                                                                                                                                                                                                                                                                                                                                                                                                                                                                                        |
| Complete List of Authors:       | Xu, Tao; National Center for Women and Children's Health, Chinese Center for Disease Control and Prevention,<br>Yue, Qing; National Center for Women and Children's Health, Chinese Center for Disease Control and Prevention<br>Wang, Yan; National Center for Women and Children's Health, Chinese Center for Disease Control and Prevention<br>Wang, Shuo; National Center for Women and Children's Health, Chinese Center for Disease Control and Prevention<br>Liu, Wenli; School of Brain and Cognitive Sciences, Beijing Normal University<br>Huang, Xiaoyan; Department of Social Work and Social Policy, Zhou Enlai School of Government, |
| <b>Primary Subject Heading</b>: | Global health                                                                                                                                                                                                                                                                                                                                                                                                                                                                                                                                                                                                                                      |
| Secondary Subject Heading:      | Health services research, Public health, Qualitative research, Paediatrics                                                                                                                                                                                                                                                                                                                                                                                                                                                                                                                                                                         |
| Keywords:                       | China, child maltreatment, risk factor, health professionals                                                                                                                                                                                                                                                                                                                                                                                                                                                                                                                                                                                       |
|                                 |                                                                                                                                                                                                                                                                                                                                                                                                                                                                                                                                                                                                                                                    |

SCHOLARONE™  
Manuscripts

1  
2  
3  
4 **The perception on risk factors for child maltreatment in China: A qualitative**  
5 **study among health professionals**  
6  
7  
8  
9

10  
11 Tao Xu<sup>1\*</sup>, Qing Yue<sup>1</sup>, Yan Wang<sup>1</sup>, Shuo Wang<sup>1</sup>, Wenli Liu<sup>2</sup>, Xiaoyan Huang<sup>3</sup>  
12

13  
14 1. Child Health Care Department, National Center for Women and Children's Health,  
15  
16 Chinese Center for Disease Control and Prevention, Beijing, China  
17

18  
19 2. School of Brain and Cognitive Sciences, Beijing Normal University, Beijing, China  
20

21  
22 3. Department of Social Work and Social Policy, Zhou Enlai School of Government,  
23  
24 Nankai University, Tianjin, China  
25  
26  
27  
28  
29

30  
31 **Corresponding author:** Dr. Tao Xu, Room 601, No. 12 Da Huisi Rd, Haidian  
32  
33 District, Beijing, China, 100081, Email address: xutao6622@163.com,  
34  
35 Tel: 86-10-62170917, Fax: 86-10-62170900.  
36  
37  
38  
39  
40  
41  
42  
43  
44  
45  
46  
47  
48  
49  
50  
51  
52  
53  
54  
55  
56  
57  
58  
59  
60

## Abstract

**Objectives:** The aim of this study was to explore the perception on risk factors for child maltreatment among health professionals in China.

**Design:** Qualitative research.

**Setting:** The study was conducted in November and December 2014 in Hunan, Zhejiang, Shaanxi and Guangdong province in China.

**Participants:** Five communities in one city and five townships in one county were randomly selected and interviews were conducted in maternal and child health hospitals, children's hospitals, community health service centers and township hospitals in the selected areas. Doctors, nurses and managerial staff engaged in child health care services were approached for in-depth-interview.

**Results:** A total of 102 health professionals were approached but 95 completed the interview. From their perspective, risk factors causing child maltreatment might be divided into four domains: 1) Cultural factors, including parents' indisputable authority, and Chinese people's preference for sons; 2) Social factors, including a fast-paced and stressful life, children left behind by migrant worker parents, and abnormal education; 3) Family factors, including economic status, family structure, parents' inability to parent or personality, experience of maltreatment, and parents' illnesses; 4) Children's factors, including gender, temper, disabilities, and poor awareness of self-protection.

**Conclusions:** The results indicate that health professionals in China have realized the risk of certain factors leading to child maltreatment; however, some views still require updating. Based on the perception of health professionals, targeted training courses are needed in order to enable them to correctly identify and deal with suspected cases of child maltreatment.

**Key words:** China; child maltreatment; risk factor; health Professionals

1  
2  
3  
4  
5  
6  
7  
8  
9  
10  
11  
12  
13  
14  
15  
16  
17  
18  
19  
20  
21  
22  
23  
24  
25  
26  
27  
28  
29  
30  
31  
32  
33  
34  
35  
36  
37  
38  
39  
40  
41  
42  
43  
44  
45  
46  
47  
48  
49  
50  
51  
52  
53  
54  
55  
56  
57  
58  
59  
60

For peer review only



## Strengths and limitations of this study

- This study uses qualitative research method to explore the perception of risk factors for child maltreatment among health professionals in China
- This study is an important attempt to carry a step forward towards child maltreatment prevention programs in China.
- A limitation of this qualitative study is that it only reflects the population studied.

## Introduction

Child maltreatment constitutes all forms of physical and/or emotional ill treatment, sexual abuse, neglect, negligent treatment, commercial and/or other exploitation that occurs to children under 18 years of age.<sup>1,2</sup> The consequences of child maltreatment are more wide-ranging than death and injury.<sup>3</sup> For instance, child maltreatment has been associated with a myriad of adverse consequences throughout children's lifespan, including harm to the victim's physical and mental health, life quality, well-being and development.<sup>4,5</sup> It also leads to a huge financial burden on individuals, families and the country.<sup>6</sup>

Although most studies on child maltreatment have been conducted in developed countries, child maltreatment is common throughout the entire world.<sup>7,8</sup> In China, child maltreatment was not recognized as a social problem until the early 1990s, but prevalence has been increasing.<sup>9</sup> Although China is a signatory to the UN Convention on the Rights of the Child, neither a formal child protection system nor a network of social services exists to support "at risk" families.<sup>10</sup> A recent literature review reported the prevalence of physical abuse lies between 32.4% and 67.3%, sexual abuse between 10.2% and 25.5%, emotional abuse between 10.6% and 67.1%, and

neglect between 22.4% and 54.9% reported by different researchers in China.<sup>11</sup>

Since late 1990s, the Chinese government has been working to strengthen the child protection system through various efforts. Under a policy titled the “Equalization of Basic Public Health Service”, community and township healthcare centers provide free basic healthcare services for children aged 0-6 years, including medical examination, nutrition advice and a feeding guide, and psychological development assessment<sup>12</sup>. Under this policy, healthcare professionals can play a key part in identifying, dealing with and reporting maltreatment cases, as well as providing referrals that can prevent further maltreatment.<sup>6,13</sup> In 2016, the National People’s Congress (NPC) issued the “Anti-domestic Violence Law”, in which any forms of maltreatment including corporal punishment are prohibited. Under the regulation of this law, healthcare professionals at all levels have the legal responsibility to report any potential child maltreatment case to the police authority. Healthcare workers are placed in a position that requires them to identify and report potential child maltreatment cases. Their knowledge and attitudes are essential factors in fulfilling these obligations<sup>12</sup>.

Preventing child maltreatment requires a diverse approach across different sectors, and only with knowledge of risk factors can interventions be designed.<sup>1,3</sup> Thus, this study aimed to explore the perception of risk factors for child maltreatment among health professionals in China, in order to develop targeted training courses and help them improve their ability to identify and intervene child maltreatment.

## **Methods**

### ***Study setting***

The study was conducted in November and December 2014 in Hunan, Zhejiang, Shaanxi and Guangdong province. A multistage sampling method was used to select study participants. One city and one county were randomly selected in each province,

1  
2  
3  
4 and five communities in the city and five townships in the county were randomly  
5  
6 selected. Interviews were conducted in maternal and child health hospitals, children's  
7  
8 hospitals, community health service centers and township hospitals in the selected  
9  
10 areas. Doctors, nurses and managerial staff engaged in child health care services were  
11  
12 approached to participate. This study has been reviewed and approved by Institutional  
13  
14 Review Board of National Center for Women and Children's Health, Chinese Center  
15  
16 for Disease Control and Prevention.

### 17 18 ***Sampling procedures***

19  
20  
21 A combination of convenience sampling and sampling with a purpose were  
22  
23 utilized. The first stage involved the selection and approaching of key informants,  
24  
25 most of whom were managerial staff from the above mentioned medical care service  
26  
27 institutions. As the second stage, with the help of key informants, the selection  
28  
29 involved a purposeful sample framework including variables such as occupational  
30  
31 categories, type of departments, and professional levels. The sampling process  
32  
33 stopped when no new themes emerged during the interviews and an acceptable  
34  
35 interpretative framework was constructed.

### 36 37 ***Patient and Public Involvement***

38  
39  
40 This research was done without patient and public involvement.

### 41 42 ***Data collection***

43  
44  
45 The study collected qualitative data using in-depth interviews with a semi-structured  
46  
47 interview outline. The themes included current situation of child maltreatment,  
48  
49 reasons for children to be maltreated, and suggestions on healthcare worker's role in  
50  
51 maltreatment prevention. Each interview was conducted in a private room on a  
52  
53 one-to-one basis in the health provider's office or any other places according to the  
54  
55 participant's request. The interviewers were members of our research team who had  
56  
57 experience of in-depth interview. A written consent was obtained before each  
58  
59

1  
2  
3  
4 interview. The duration of each interview ranged from 45 min to 1.5 h. All interviews  
5  
6 were recorded.

### 7 8 ***Data analysis***

9  
10  
11 MAXQDA (version 11.0) was used to facilitate the data analysis. All interviews were  
12  
13 transcribed by the fourth author, and the quality of the transcription was  
14  
15 double-checked by the third author. The transcripts were coded and analysed by the  
16  
17 second author. After careful and repeated examination of the transcripts, categories  
18  
19 and subcategories of analysis were developed. Totally 24 codes and 11 code families  
20  
21 were created. This made it easier to analyze by individual family code as well as  
22  
23 visualize the relations among codes in a network.<sup>14</sup> A constant comparative method  
24  
25 was employed to facilitate theme development, following recommended steps.<sup>15</sup> All  
26  
27 codes relevant to perceived risk factors were searched and results categories were  
28  
29 determined based on common themes across related codes. The coding strategy and  
30  
31 procedure were double-checked by the first author to reach a consensus on the results.  
32

## 33 **Results**

### 34 35 36 ***Sample characteristics***

37  
38  
39 102 healthcare workers were approached. Two of them refused the interview  
40  
41 invitation and 5 did not complete the interview due to emergency medical cases that  
42  
43 need them to deal with. Table 1 summaries the demographic variables of the  
44  
45 interviewees. The participants included 95 medical workers, with 40 males and 55  
46  
47 females. Most interviewees were doctors (65.3%). The professionals from general  
48  
49 hospitals (32.6%) were almost as many as those from maternal and child health  
50  
51 hospitals (33.7%). As for professional titles, most interviewees held senior titles  
52  
53 (47.4%).

54  
55 Table 1 Demographic characteristic of health professionals completed the in-depth  
56  
57 interview

|                                    | Male   | Female | Total  | %    |
|------------------------------------|--------|--------|--------|------|
|                                    | (n=40) | (n=55) | (n=95) |      |
| <b>Province</b>                    |        |        |        |      |
| Zhejiang                           | 10     | 14     | 24     | 25.3 |
| Guangdong                          | 12     | 12     | 24     | 25.3 |
| Shanxi                             | 10     | 13     | 23     | 24.2 |
| Hunan                              | 8      | 16     | 24     | 25.3 |
| <b>Hospital level</b>              |        |        |        |      |
| General hospital                   | 11     | 20     | 31     | 32.6 |
| Children's hospital                | 1      | 1      | 2      | 2.1  |
| Maternal and child health hospital | 16     | 16     | 32     | 33.7 |
| Community health service Center    | 7      | 15     | 22     | 23.2 |
| Township hospital                  | 5      | 3      | 8      | 8.4  |
| <b>Occupational category</b>       |        |        |        |      |
| Doctors                            | 25     | 37     | 62     | 65.3 |
| Nurses                             | 0      | 9      | 9      | 9.5  |
| Managers                           | 15     | 9      | 24     | 25.3 |
| <b>Professional level</b>          |        |        |        |      |
| Senior                             | 20     | 25     | 45     | 47.4 |
| Intermediate                       | 14     | 18     | 32     | 33.7 |
| Primary                            | 6      | 12     | 18     | 18.9 |

### ***Risk factors for child maltreatment***

Analysis of the interview transcriptions yielded four primary themes relevant to risk factors for child maltreatment: (a) cultural factors; (b) social factors; (c) family

factors; and (d) children's own factors. These four primary themes were divided into sub-themes to elucidate pertinent aspects (see Fig. 1).

(Insert Fig. 1 here)

### **Cultural factors**

In Chinese traditional culture, parents have indisputable authority and children's disobedience is strictly forbidden. Under the influence of some typical Chinese traditional phrases, such as "Spare the rod and spoil the child", parents tend to beat their children at will.

Influenced by the utilitarian climate, many parents keep up with the Joneses by setting unreasonable expectations and demands for their children, and physically punish their child if they fail to meet these expectations.

*Some parents' expectations for their children are too high. They feel disappointed, which causes physical abuse. (Community health worker, female, aged 28)*

The traditional preference for sons in China leads to maltreatment of girls, including physical abuse and neglect.

*People living in remote or mountainous areas prefer boys to girls. Contrary to their expectation, they give birth to girls, resulting in tendency to neglect. (Doctor in child hospital, male, aged 35)*

### **Social factors**

The pace of life in modern China is much faster than before, and citizens bear heavy life stress as China's society moves towards a highly commercial one. Parents have relatively limited time and patience to take care of their children.

*Most parents working in cities or farming in rural areas have limited time and*

1  
2  
3  
4 *energy. (Community health worker, female, aged 36)*

5  
6 Some children are left in the care of grandparents or other relatives when their  
7 parents migrate to the cities for work. These children are more likely to suffer from  
8 maltreatment.  
9

10  
11  
12  
13 *Most of them are taken care of by their grandparents, and comparatively can't*  
14 *be supervised effectively. (Community health worker, male, aged 38)*

### 17 **Family factors**

18  
19  
20 Families' economic status may exert great impact on children's well-being.  
21 Child maltreatment happens relatively more frequently in families with poor  
22 economic conditions. Children of single parents or in combined families tend to be at  
23 greater risk of maltreatment.  
24  
25  
26  
27

28  
29 *Child maltreatment is related to economic conditions... One grandma [in my*  
30 *village] had no money and tried to relieve her stress by abusing the child. (Nurse in*  
31 *maternal and child health hospital, female, aged 32)*

32  
33  
34  
35  
36 *Sexual abuse might be committed by the stepfathers. Some stepmothers*  
37 *refuse to take care of the meals [for the children], and even beat them when their*  
38 *father is not at home. (Manager in maternal and child health, female, aged 45)*

39  
40  
41  
42  
43 Education also plays a large role. As some parents lack parenting skills, they  
44 think only physical punishment will make children more obedient.  
45

46  
47  
48 *Many of these parents believe children tend to remember what parents say after*  
49 *being beat rather than reasoning. (Doctor in maternal and child health care center,*  
50 *male, aged 30)*

51  
52  
53  
54  
55 Maltreatment is more likely to be committed by parents suffering from mental  
56 health issues, and parents who experienced maltreatment themselves when they were  
57

1  
2  
3  
4 young.

5  
6 *As he [the father] was maltreated himself, he copies this behavior to his*  
7 *child. (Nurse in child hospital, female, aged 35)*  
8  
9

### 10 **Children's own factors**

11  
12  
13  
14 Children who are mischievous, bad-tempered or congenitally handicapped are  
15  
16 more likely to suffer from maltreatment.  
17

18  
19 *Sometimes it's because the child is too naughty. They are prone to being*  
20 *maltreated if they have congenital defects. Another issue is the intelligence of children.*  
21  
22 *(Hospital manager in maternal and child health care center, male, aged 41)*  
23  
24

25  
26 Some interviewees mentioned that children's lack of self-protection awareness,  
27  
28 and even being completely unaware of being maltreated, increases the risk of  
29  
30 maltreatment for the child.  
31

32  
33 Children of different genders are differently at risks for maltreatment. Girls are  
34  
35 more likely to suffer from maltreatment, except when children have disabilities, in  
36  
37 which case both genders are equally at risk.  
38

39  
40 *I think girls are more likely to suffer from sexual abuse and neglect than boys.*  
41  
42 *For children with congenital defects, the possibilities for boys and girls are more or*  
43 *less the same. (Manager in community health care center, female, aged 40)*  
44  
45  
46

### 47 **Discussion**

48  
49  
50 Our study identified the risk factors for child maltreatment in China as perceived  
51  
52 by health professionals. Given their unique roles with children and families, health  
53  
54 professionals should be alerted to risk factors that may suggest suspected cases. There  
55  
56 is a direct association between the act of reporting cases and matters related to  
57  
58 knowledge.<sup>16</sup> We found that in the view of Chinese health professionals, many factors  
59  
60



1  
2  
3  
4 might increase the risk of child maltreatment, including cultural, social, family factors  
5 and those of the child itself.  
6  
7

8  
9 Cultural factors are very important in understanding child abuse. In Chinese  
10 tradition, the experience of deliberately inflicted pain is regarded as  
11 character-building.<sup>17</sup> Chinese people seem to be less critical of the use of physical  
12 force by parents to accomplish desired ends.<sup>18</sup> The traditional value of filial piety  
13 (*Xiao*) gives parents indisputable authority. This is why children's disobedience  
14 toward parents is the most common reason for maltreatment.<sup>19</sup> Additionally, under the  
15 one-child policy launched in 1979, Parents tend to attach higher value and put greater  
16 expectations on children, and punish them once the expectations fail to be met.<sup>20</sup>  
17  
18  
19  
20  
21  
22  
23  
24

25 In China, conventional wisdom that sons are preferable to daughters is embedded  
26 within patrilineal family structures.<sup>21</sup> Although the inherent son preference is on  
27 decline, sons are still desired more frequently than daughters.<sup>22</sup> Deep-rooted  
28 Confucian values play a part.<sup>23</sup>  
29  
30  
31  
32

33 With rapid economic development in China, the pace of life and stress on  
34 parents has increased, which negatively affect parenting practices.<sup>9</sup> The respondents  
35 have also recognized the children who are left behind when their parents go to work  
36 in cities. This is consistent with many studies exploring the influence of rural-to-urban  
37 labor migration.<sup>24</sup> With the processes of modernization and urbanization, many  
38 children are left behind, and should be given special attention.  
39  
40  
41  
42  
43  
44  
45

46 The interviewees perceived low family economic status as a risk factor, which  
47 can affect the parent-child relationships by limiting economic resources and  
48 increasing parents' stress levels.<sup>9</sup> Instances of single parent families and combined  
49 families have been increasing in China. The financial stresses of being a single parent,  
50 and social stresses due to isolation and a lack of social support all play a part in the  
51 increased risk in single parent families.<sup>25</sup> When a single parent remarries, children  
52 may have difficulties in dealing with relationships with new family members, putting  
53  
54  
55  
56  
57  
58  
59  
60

1  
2  
3  
4 them at an increased risk of maltreatment. Previous studies reported a number of  
5 characteristics, including education level, lack of skills, patience or responsibility,  
6 were linked to child abuse. For example, parents with low education levels were  
7 reported in the literature to present a 5-fold increase in risk.<sup>25</sup> In another study, parents  
8 who were more likely to abuse children physically were found to have poor control of  
9 their impulses and mental health problems.<sup>26</sup> All this indicated the necessity of  
10 parenting skill education. Health professionals need to make effort to build  
11 harmonized parent-child relationship and happier family environment .  
12  
13  
14  
15  
16  
17  
18  
19

20 It is clear that children are victims, and cannot be blamed for the maltreatment  
21 suffered. However, children with several characteristics are more prone to  
22 maltreatment, including curiousness of young age, physical or mental handicaps,  
23 premature birth or with low-birth weight.<sup>25</sup> While health professionals didn't mention  
24 the latter two, they did identify poor awareness of self-protection and children's  
25 character. This indicates that some health professionals misunderstood the underlying  
26 reasons by blaming children instead of perpetrators, and show tolerance to  
27 maltreatment such as corporal punishment.  
28  
29  
30  
31  
32  
33  
34  
35

36 It has been a consensus that girls are at higher risk for sexual abuse, emotional  
37 abuse and neglect, whereas boys are more likely to be victims of physical abuse in  
38 many countries.<sup>8</sup> Wide cultural gaps exist between different societies and studies in  
39 China produced mixed findings, with boys being more likely to experience both  
40 physical and emotional abuse.<sup>9</sup> Boys may be at greater risk as they are perceived as  
41 inherently having greater responsibility for social obligations, support for parents and  
42 preserving family heritage.<sup>26</sup> However, health professionals failed to realize the risk  
43 of boys' abuse. Further research is still needed to validate the gender differences.  
44  
45  
46  
47  
48  
49  
50  
51  
52  
53  
54  
55  
56  
57  
58  
59  
60

## Conclusion

1  
2  
3  
4 This study is an attempt to carry a step forward in terms of training health  
5 professionals in China. Training is required to increase knowledge of health  
6 professionals in order to help them understand the cause of child maltreatment and  
7 meet the qualifications to practice prevention and treatment of child maltreatment.  
8 The results of this study provide basis for developing targeted child maltreatment  
9 prevention training courses for health professionals.  
10  
11  
12  
13  
14

### 15 16 **Acknowledgements**

17  
18  
19 This study was accepted for oral presentation in the 2015 ISPCAN Asia Pacific  
20 Regional Conference on Child Abuse and Neglect. We are grateful to Ms. CaiYue and  
21 Chen Xuemei from UNICEF for providing technical support. We also thank all the  
22 health workers who participated in this study. We thank Ms. Margaux Schreurs for  
23 the help with editing the language.  
24  
25  
26  
27  
28

### 29 **Contributors' Statement**

30  
31  
32 The research design, data analysis and manuscript of this study were completed by  
33 TX and QY. The interview was completed by SW, YW, WL and XH. All authors  
34 approved the final manuscript as submitted and agree to be accountable for all aspects  
35 of the work.  
36  
37  
38  
39  
40

### 41 **Competing interests**

42  
43  
44 None declared.  
45  
46

### 47 **Funding**

48  
49 The study was funded by UNICEF Beijing Office.  
50  
51

### 52 **Data sharing statement**

53  
54  
55 The data set is available on request from the corresponding author.  
56  
57  
58  
59  
60

## References

1. World Health Organization. Child maltreatment. [http:// www.who.int/mediacentre/ factsheets/fs150/en/](http://www.who.int/mediacentre/factsheets/fs150/en/).2014, WHO. Geneva.
2. World Health Organization. Report of the Consultation on Child Abuse Prevention. 1999, WHO. Geneva.
3. World Health Organization & ISPCAN. Preventing child maltreatment: a guide to taking action and generating evidence. 2006, WHO, Geneva.
4. Kiser LJ, Stover CS, NavaltaCP, Dorado J, Vogel JM, Abdul-AdilJK, Kim S, Lee RC, Vivrette R, Briggs EC. Effects of the child-perpetrator relationship on mental health outcomes of child abuse: It's (not) all relative. *Child Abuse & Neglect*, 2014; 38:1083-1093.
5. Sidebotham P, Heron J; ALSPAC Study Team. Child maltreatment in the “children of the nineties:” the role of the child. *Child Abuse Negl*, 2003;27:337-352.
6. Pietrantonio AM, Wright E, Gibson KN, Alldred T, Jacobson D, Niec A. Mandatory reporting of child abuse and neglect: Crafting a positive process for health professionals and caregivers. *Child Abuse & Neglect*, 2013;37:102-109.
7. Jui-Ying Feng, Murray Levine. Factors associated with nurses' intention to report child abuse: A national survey of Taiwanese nurses. *Child Abuse & Neglect*, 2005; 29:783–795.
8. Etienne G, Krug, Linda L. Dahlberg, James A. Mercy, Anthony B. Zwi, Rafael Lozano. World report on violence and health. 2002, WHO, Geneva.

- 1  
2  
3  
4 9. Minli Liao, Alvin Shiulain Lee, Amelia C. Roberts-Lewis, Jun Sung Hong, Kaishan  
5  
6 Jiao. Child maltreatment in China: An ecological review of the literature.  
7  
8  
9 Children and Youth Services Review, 2011;33:1709-1719.  
10  
11  
12 10. Hesketh T, Hong ZS, Lynch MA. Child abuse in China: the views and  
13  
14 experiences of child health professionals. Child Abuse & Neglect, 2000;24:867-872.  
15  
16  
17 11. Xu Tao, Jiao Fuyong, Pan Jianping, Chen Jingqi, Huang Xiaoyan, Liu Wenli,  
18  
19 Gong Limin, Wang Huishan. A systematic literature review of child maltreatment in  
20  
21 China (in Chinese). Chinese journal of child health care, 2014;22: 972-975.  
22  
23  
24 12. Li X, Yue Q, Wang S, Wang H, Jiang J, Gong L, Liu W, Huang X, Xu T.  
25  
26 Knowledge, attitudes, and behaviours of healthcare professionals regarding child  
27  
28 maltreatment in China. Child Care Health Dev. 2017;1-7.  
29  
30  
31 13. Wekerle C. Resilience in the context of child maltreatment: Connections to  
32  
33 practice. Child Abuse & Neglect, 2013;37:93-101.  
34  
35  
36 14. Li L, Sun S, Wu Z, Wu S, Lin C, Yan Z. Disclosure of HIV status  
37  
38 is a family matter: field notes from China. J Fam Psychol, 2007;21:307-314.  
39  
40  
41 15. Dye JF, Schatz I M, Rosenberg BA, & Coleman S T. Constant comparison  
42  
43 method: A kaleidoscope of data. Practicing Qualitative Research. 2000.  
44  
45  
46 16. Moreira GA, Vieira LJ, Deslandes SF, Pordeus MA, Gama Ida S, Brilhante AV.  
47  
48 Factors associated with the report and adolescent abuse in primary healthcare.  
49  
50 CienSaude Colet, 2014;19:4267-4276.  
51  
52  
53 17. Wu DYH. Child abuse in Taiwan. In J. E. Korbin (Ed.), Child abuse and neglect:  
54  
55 Cross-cultural perspectives. Berkeley, CA: University of California Press. 1981;139–  
56  
57  
58  
59  
60

1  
2  
3  
4 165.  
5

6 18. George K. HONG, Lawrence K. HONG. Comparative perspectives on child abuse  
7 and neglect: Chinese versus Hispanics and Whites. *Child Welfare*, 1991;70:463-475.  
8  
9

10 19. Leung PW, Wong WC, Chen WQ, Tang CS. Prevalence and determinants of child  
11 maltreatment among high school students in Southern China: A large-scale  
12 school based survey. *Child and Adolescent Psychiatry and Mental Health*,  
13 2008;2:27-48.  
14  
15

16 20. Hua J, Mu Z, Nwaru BI, Gu G, Meng W, Wu Z. Child neglect in one-child  
17 families from Suzhou City of mainland China. *BMC Int Health Hum Rights*,  
18 2014;14:8.  
19  
20

21 21. Murphy R, Tao R, Lu X. Son preference in rural China: patrilineal families and  
22 socioeconomic change. *Popul Dev Rev*, 2011;37:665-690.  
23  
24

25 22. Zhou C, Wang XL, Zhou XD, Hesketh T. Son preference and sex-selective  
26 abortion in China: informing policy options. *Int J Public Health*, 2012;57: 459-465.  
27  
28

29 23. Das Gupta M, Jiang L, Xie Z, Li B, Woojin C, Bae H. Why is son preference so  
30 persistent in East and South Asia? A cross-country study of China, India and the  
31 Republic of Korea. *J Dev Stud*, 2003; 40:153–187.  
32  
33

34 24. Wang X, Ling L, Su H, Cheng J, Jin L, Sun YH. Self-concept of left-behind  
35 children in China: a systematic review of the literature. *Child Care Health Dev*,  
36 2015;41(3):346-55.  
37  
38

39 25. Sidebotham P, Heron J; ALSPAC Study Team. Child maltreatment in the  
40 “children of the nineties”: A cohort study of risk factors. *Child Abuse Negl*, 2006;30:  
41 497-522.  
42  
43  
44  
45  
46  
47  
48  
49  
50  
51  
52  
53  
54  
55  
56  
57  
58  
59  
60

1  
2  
3  
4 26. Klevens J, Bayón MC, Sierra M. Risk factors and context of men who  
5  
6 physically abuse in Bogotá, Colombia. Child Abuse Negl, 2000;24:323-332.  
7  
8  
9  
10  
11  
12  
13  
14  
15  
16  
17  
18  
19  
20  
21  
22  
23  
24  
25  
26  
27  
28  
29  
30  
31  
32  
33  
34  
35  
36  
37  
38  
39  
40  
41  
42  
43  
44  
45  
46  
47  
48  
49  
50  
51  
52  
53  
54  
55  
56  
57  
58  
59  
60

For peer review only

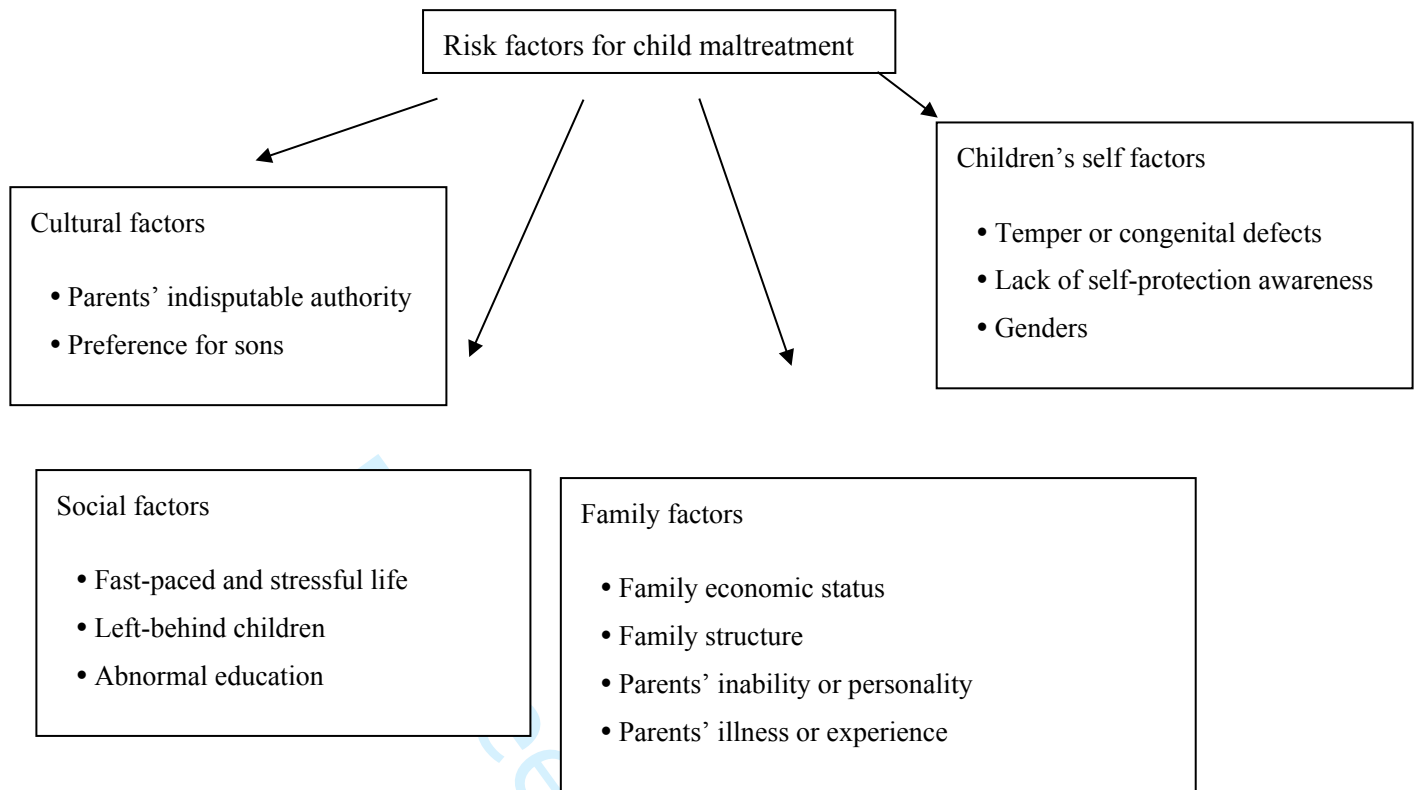

Fig. 1 Primary themes with sub-themes summarized on the perceived risk factors for child maltreatment



## Standards for Reporting Qualitative Research (SRQR)\*

|                                                                                                                                                                                                                                                                                                                                                                                                      | Page/line no(s).                    |
|------------------------------------------------------------------------------------------------------------------------------------------------------------------------------------------------------------------------------------------------------------------------------------------------------------------------------------------------------------------------------------------------------|-------------------------------------|
| <b>Title and abstract</b>                                                                                                                                                                                                                                                                                                                                                                            |                                     |
| <b>Title</b> - Concise description of the nature and topic of the study Identifying the study as qualitative or indicating the approach (e.g., ethnography, grounded theory) or data collection methods (e.g., interview, focus group) is recommended                                                                                                                                                | Page 1 line 1                       |
| <b>Abstract</b> - Summary of key elements of the study using the abstract format of the intended publication; typically includes background, purpose, methods, results, and conclusions                                                                                                                                                                                                              | Page 2                              |
| <b>Introduction</b>                                                                                                                                                                                                                                                                                                                                                                                  |                                     |
| <b>Problem formulation</b> - Description and significance of the problem/phenomenon studied; review of relevant theory and empirical work; problem statement                                                                                                                                                                                                                                         | Page 3 line 10-30; page 4 line 1-11 |
| <b>Purpose or research question</b> - Purpose of the study and specific objectives or questions                                                                                                                                                                                                                                                                                                      | Page 4 line 14-16                   |
| <b>Methods</b>                                                                                                                                                                                                                                                                                                                                                                                       |                                     |
| <b>Qualitative approach and research paradigm</b> - Qualitative approach (e.g., ethnography, grounded theory, case study, phenomenology, narrative research) and guiding theory if appropriate; identifying the research paradigm (e.g., postpositivist, constructivist/ interpretivist) is also recommended; rationale**                                                                            | Page 5 line 11-12                   |
| <b>Researcher characteristics and reflexivity</b> - Researchers' characteristics that may influence the research, including personal attributes, qualifications/experience, relationship with participants, assumptions, and/or presuppositions; potential or actual interaction between researchers' characteristics and the research questions, approach, methods, results, and/or transferability | Page 5 line 16                      |
| <b>Context</b> - Setting/site and salient contextual factors; rationale**                                                                                                                                                                                                                                                                                                                            | Page 4 line 19-28                   |
| <b>Sampling strategy</b> - How and why research participants, documents, or events were selected; criteria for deciding when no further sampling was necessary (e.g., sampling saturation); rationale**                                                                                                                                                                                              | Page 4 line 30, page 5 line 1-7     |
| <b>Ethical issues pertaining to human subjects</b> - Documentation of approval by an appropriate ethics review board and participant consent, or explanation for lack thereof; other confidentiality and data security issues                                                                                                                                                                        | Page 4 line 26-28, page 5 line 9    |
| <b>Data collection methods</b> - Types of data collected; details of data collection procedures including (as appropriate) start and stop dates of data collection and analysis, iterative process, triangulation of sources/methods, and modification of procedures in response to evolving study findings; rationale**                                                                             | Page 5 line 11-17                   |

|    |                                                                                         |                 |
|----|-----------------------------------------------------------------------------------------|-----------------|
| 1  |                                                                                         |                 |
| 2  |                                                                                         |                 |
| 3  | <b>Data collection instruments and technologies</b> - Description of instruments (e.g., |                 |
| 4  | interview guides, questionnaires) and devices (e.g., audio recorders) used for data     | Page 5 line 11- |
| 5  | collection; if/how the instrument(s) changed over the course of the study               | 17              |
| 6  |                                                                                         |                 |
| 7  | <b>Units of study</b> - Number and relevant characteristics of participants, documents, |                 |
| 8  | or events included in the study; level of participation (could be reported in results)  | Page 6 line 1-9 |
| 9  |                                                                                         |                 |
| 10 | <b>Data processing</b> - Methods for processing data prior to and during analysis,      |                 |
| 11 | including transcription, data entry, data management and security, verification of      | Page 5 line 19- |
| 12 | data integrity, data coding, and anonymization/de-identification of excerpts            | 21              |
| 13 |                                                                                         |                 |
| 14 | <b>Data analysis</b> - Process by which inferences, themes, etc., were identified and   |                 |
| 15 | developed, including the researchers involved in data analysis; usually references a    | Page 5 line 22- |
| 16 | specific paradigm or approach; rationale**                                              | 29              |
| 17 |                                                                                         |                 |
| 18 | <b>Techniques to enhance trustworthiness</b> - Techniques to enhance trustworthiness    |                 |
| 19 | and credibility of data analysis (e.g., member checking, audit trail, triangulation);   | Page 5 line 22- |
| 20 | rationale**                                                                             | 29              |

### Results/findings

|    |                                                                                             |               |
|----|---------------------------------------------------------------------------------------------|---------------|
| 23 | <b>Synthesis and interpretation</b> - Main findings (e.g., interpretations, inferences, and |               |
| 24 | themes); might include development of a theory or model, or integration with                |               |
| 25 | prior research or theory                                                                    | Page 6-page 9 |
| 26 |                                                                                             |               |
| 27 | <b>Links to empirical data</b> - Evidence (e.g., quotes, field notes, text excerpts,        |               |
| 28 | photographs) to substantiate analytic findings                                              | Page 6-page 9 |
| 29 |                                                                                             |               |

### Discussion

|    |                                                                                           |                |
|----|-------------------------------------------------------------------------------------------|----------------|
| 32 | <b>Integration with prior work, implications, transferability, and contribution(s) to</b> |                |
| 33 | <b>the field</b> - Short summary of main findings; explanation of how findings and        |                |
| 34 | conclusions connect to, support, elaborate on, or challenge conclusions of earlier        |                |
| 35 | scholarship; discussion of scope of application/generalizability; identification of       |                |
| 36 | unique contribution(s) to scholarship in a discipline or field                            | Page 9-page 11 |
| 37 |                                                                                           |                |
| 38 | <b>Limitations</b> - Trustworthiness and limitations of findings                          |                |
| 39 |                                                                                           |                |

### Other

|    |                                                                                            |                 |
|----|--------------------------------------------------------------------------------------------|-----------------|
| 42 | <b>Conflicts of interest</b> - Potential sources of influence or perceived influence on    |                 |
| 43 | study conduct and conclusions; how these were managed                                      | Page 12 line 12 |
| 44 |                                                                                            |                 |
| 45 | <b>Funding</b> - Sources of funding and other support; role of funders in data collection, |                 |
| 46 | interpretation, and reporting                                                              | Page 13 line 7  |
| 47 |                                                                                            |                 |

\*The authors created the SRQR by searching the literature to identify guidelines, reporting standards, and critical appraisal criteria for qualitative research; reviewing the reference lists of retrieved sources; and contacting experts to gain feedback. The SRQR aims to improve the transparency of all aspects of qualitative research by providing clear standards for reporting qualitative research.

1  
2  
3  
4  
5  
6  
7  
8  
9  
10  
11  
12  
13  
14  
15  
16  
17  
18  
19  
20  
21  
22  
23  
24  
25  
26  
27  
28  
29  
30  
31  
32  
33  
34  
35  
36  
37  
38  
39  
40  
41  
42  
43  
44  
45  
46  
47  
48  
49  
50  
51  
52  
53  
54  
55  
56  
57  
58  
59  
60

\*\*The rationale should briefly discuss the justification for choosing that theory, approach, method, or technique rather than other options available, the assumptions and limitations implicit in those choices, and how those choices influence study conclusions and transferability. As appropriate, the rationale for several items might be discussed together.

**Reference:**

O'Brien BC, Harris IB, Beckman TJ, Reed DA, Cook DA. **Standards for reporting qualitative research: a synthesis of recommendations.** *Academic Medicine*, Vol. 89, No. 9 / Sept 2014  
DOI: 10.1097/ACM.0000000000000388

For peer review only

# BMJ Open

## The perception on risk factors of child maltreatment in China: A qualitative study among health professionals

|                                 |                                                                                                                                                                                                                                                                                                                                                                                                                                                                                                                                                                                                                                                    |
|---------------------------------|----------------------------------------------------------------------------------------------------------------------------------------------------------------------------------------------------------------------------------------------------------------------------------------------------------------------------------------------------------------------------------------------------------------------------------------------------------------------------------------------------------------------------------------------------------------------------------------------------------------------------------------------------|
| Journal:                        | <i>BMJ Open</i>                                                                                                                                                                                                                                                                                                                                                                                                                                                                                                                                                                                                                                    |
| Manuscript ID                   | bmjopen-2019-029071.R2                                                                                                                                                                                                                                                                                                                                                                                                                                                                                                                                                                                                                             |
| Article Type:                   | Research                                                                                                                                                                                                                                                                                                                                                                                                                                                                                                                                                                                                                                           |
| Date Submitted by the Author:   | 11-Apr-2019                                                                                                                                                                                                                                                                                                                                                                                                                                                                                                                                                                                                                                        |
| Complete List of Authors:       | Xu, Tao; National Center for Women and Children's Health, Chinese Center for Disease Control and Prevention,<br>Yue, Qing; National Center for Women and Children's Health, Chinese Center for Disease Control and Prevention<br>Wang, Yan; National Center for Women and Children's Health, Chinese Center for Disease Control and Prevention<br>Wang, Shuo; National Center for Women and Children's Health, Chinese Center for Disease Control and Prevention<br>Liu, Wenli; School of Brain and Cognitive Sciences, Beijing Normal University<br>Huang, Xiaoyan; Department of Social Work and Social Policy, Zhou Enlai School of Government, |
| <b>Primary Subject Heading</b>: | Global health                                                                                                                                                                                                                                                                                                                                                                                                                                                                                                                                                                                                                                      |
| Secondary Subject Heading:      | Health services research, Public health, Qualitative research, Paediatrics                                                                                                                                                                                                                                                                                                                                                                                                                                                                                                                                                                         |
| Keywords:                       | China, child maltreatment, risk factor, health professionals                                                                                                                                                                                                                                                                                                                                                                                                                                                                                                                                                                                       |
|                                 |                                                                                                                                                                                                                                                                                                                                                                                                                                                                                                                                                                                                                                                    |

SCHOLARONE™  
Manuscripts

1  
2  
3  
4 **The perception on risk factors of child maltreatment in China: A qualitative**  
5 **study among health professionals**  
6  
7  
8  
9  
10

11 Tao Xu<sup>1\*</sup>, Qing Yue<sup>1</sup>, Yan Wang<sup>1</sup>, Shuo Wang<sup>1</sup>, Wenli Liu<sup>2</sup>, Xiaoyan Huang<sup>3</sup>  
12

13  
14 1. Child Health Care Department, National Center for Women and Children's Health,  
15  
16 Chinese Center for Disease Control and Prevention, Beijing, China  
17

18  
19 2. School of Brain and Cognitive Sciences, Beijing Normal University, Beijing, China  
20

21  
22 3. Department of Social Work and Social Policy, Zhou Enlai School of Government,  
23  
24 Nankai University, Tianjin, China  
25  
26  
27  
28  
29

30 **Corresponding author:** Dr. Tao Xu, Room 601, No. 12 Da Huisi Rd, Haidian  
31  
32 District, Beijing, China, 100081, Email address: xutao6622@163.com,  
33  
34 Tel: 86-10-62170917, Fax: 86-10-62170900.  
35  
36  
37  
38  
39  
40  
41  
42  
43  
44  
45  
46  
47  
48  
49  
50  
51  
52  
53  
54  
55  
56  
57  
58  
59  
60

## Abstract

**Objectives:** The aim of this study was to explore health professionals' perception of risk factors related to child maltreatment in China.

**Design:** Qualitative research.

**Setting:** The study was conducted in November and December 2014 in Hunan, Zhejiang, Shaanxi and Guangdong province in China.

**Participants:** Five urban communities and five rural communities were randomly selected in each province, and interviews were conducted in maternal and child health hospitals, children's hospitals, community health service centers and township hospitals in the selected areas. Doctors, nurses and administrators involved in child health care services were selected for in-depth-interview.

**Results:** A total of 102 health professionals were approached but 95 completed the interview. From their perspective, risk factors causing child maltreatment were categorized into four domains: 1) Cultural factors, including parents' absolute authority over their children, and son preference; 2) Social factors, including a fast-paced and stressful lifestyle, children left behind by migrant worker parents, and lack of quality child care and education; 3) Family factors, including economic status, family structure, parents' inability to provide parental care, experience of maltreatment, and parents' illnesses; 4) Children's factors, including gender, temper, disabilities, and poor awareness of self-protection.

**Conclusions:** The results indicate that health professionals in China are aware of certain risk factors for child maltreatment; however, some views are outdated and wrong. Based on the perception of health professionals, targeted training courses are needed in order to enable them to correctly identify and deal with suspected cases of child maltreatment.

**Key words:** China; child maltreatment; risk factor; health Professionals

1  
2  
3  
4  
5  
6  
7  
8  
9  
10  
11  
12  
13  
14  
15  
16  
17  
18  
19  
20  
21  
22  
23  
24  
25  
26  
27  
28  
29  
30  
31  
32  
33  
34  
35  
36  
37  
38  
39  
40  
41  
42  
43  
44  
45  
46  
47  
48  
49  
50  
51  
52  
53  
54  
55  
56  
57  
58  
59  
60

For peer review only

## Strengths and limitations of this study

- This study uses qualitative research method to explore health professionals' perception of risk factors related to child maltreatment in China
- This study is an important attempt to carry a step forward towards child maltreatment prevention programs in China.
- A limitation of this qualitative study is that it only reflects the population studied.

## Introduction

According to the World Health Organization (WHO), child maltreatment constitutes all forms of physical and/or emotional ill treatment, sexual abuse, neglect, negligent treatment, commercial and/or other exploitation that occurs to children under 18 years of age.<sup>1,2</sup> The consequences of child maltreatment are more wide-ranging than death and injury.<sup>3</sup> For instance, child maltreatment has been associated with a myriad of adverse consequences throughout children's lifespan, including harm to the victim's physical and mental health, life quality, well-being and development.<sup>4,5</sup> It also leads to a huge financial burden on individuals, families and the country.<sup>6</sup>

Although most studies on child maltreatment have been conducted in developed countries, child maltreatment is common throughout the entire world.<sup>7,8</sup> In China, child maltreatment, as defined by WHO, was not recognized as a social problem until the early 1990s, but prevalence has been increasing.<sup>9</sup> Although China is a signatory to the UN Convention on the Rights of the Child, neither a formal child protection system nor a network of social services exist to support "at risk" families.<sup>10</sup> A recent literature review reported the prevalence of physical abuse lies between 32.4% and 67.3%, sexual abuse between 10.2% and 25.5%, emotional abuse between 10.6% and



1  
2  
3  
4 67.1%, and neglect between 22.4% and 54.9% reported by different researchers in  
5  
6 China.<sup>11</sup>  
7

8  
9 Since late 1990s, the Chinese government has been working to strengthen the  
10 child protection system through various efforts. Under a policy titled the  
11 “Equalization of Basic Public Health Service”, community and township health care  
12 centers provide free basic health care services for children aged 0-6 years, including  
13 medical examination, nutrition advice and a feeding guide, and psychological  
14 development assessment<sup>12</sup>. Under this policy, health care professionals can play a key  
15 part in identifying, dealing with and reporting maltreatment cases, as well as  
16 providing referrals that can prevent further maltreatment.<sup>6,13</sup> In 2016, the National  
17 People’s Congress (NPC) issued the “Anti-domestic Violence Law”, in which any  
18 forms of maltreatment including corporal punishment are prohibited. Under the  
19 regulation of this law, health care professionals at all levels have the legal  
20 responsibility to report any potential child maltreatment cases to the police authority.  
21 Health care workers are placed in a position that requires them to identify and report  
22 potential child maltreatment cases. Their knowledge and attitudes are essential factors  
23 in fulfilling these obligations<sup>12</sup>.  
24  
25  
26  
27  
28  
29  
30  
31  
32  
33  
34  
35  
36  
37

38 Preventing child maltreatment requires a diverse approach across different  
39 sectors, and only with knowledge of risk factors can interventions be designed.<sup>1,3</sup>  
40 Thus, this study aimed to explore health professionals’ perception of risk factors  
41 related to child maltreatment in China so that targeted training courses can be  
42 developed to help health professionals identify and intervene child maltreatment.  
43  
44  
45  
46  
47  
48

## 49 **Methods**

### 50 ***Study setting***

51  
52 The study was conducted in November and December 2014 in Hunan, Zhejiang,  
53 Shaanxi and Guangdong province. A multistage sampling method was used to select  
54  
55  
56  
57  
58  
59  
60

1  
2  
3  
4 study participants. One city (urban) and one county (rural) were randomly selected in  
5 each province, and five communities in the city and five townships in the county were  
6 randomly selected. Interviews were conducted in maternal and child health hospitals,  
7 children's hospitals, community health service centers and township hospitals in the  
8 selected areas. Doctors, nurses and managerial staff engaged in child health care  
9 services were approached to participate. This study has been reviewed and approved  
10 by Institutional Review Board of National Center for Women and Children's Health,  
11 Chinese Center for Disease Control and Prevention.  
12  
13  
14  
15  
16  
17  
18  
19

### 20 ***Sampling procedures***

21  
22  
23 A combination of convenience sampling and sampling with a purpose were  
24 utilized. The first stage involved the selection and approaching of key informants,  
25 most of whom were administrators from the above mentioned health facilities. As the  
26 second stage, with the help of key informants, the selection involved a purposeful  
27 sampling framework including variables such as occupational categories, type of  
28 departments, and professional levels. The sampling process stopped when no new  
29 themes emerged during the interviews and an acceptable interpretative framework  
30 was constructed.  
31  
32  
33  
34  
35  
36  
37  
38

### 39 ***Patient and Public Involvement***

40  
41  
42 This research was done without patient and public involvement.  
43  
44

### 45 ***Data collection***

46  
47 The study collected qualitative data using in-depth interviews with a semi-structured  
48 interview outline. The themes included current situation of child maltreatment,  
49 reasons for children to be maltreated, and suggestions on healthcare worker's role in  
50 maltreatment prevention. Each interview was conducted in a private room on a  
51 one-to-one basis in the health provider's office or any other places according to the  
52 participant's request. The interviewers were members of our research team who had  
53  
54  
55  
56  
57  
58  
59  
60

1  
2  
3  
4 experience of in-depth interview. A written consent was obtained before each  
5  
6 interview. The duration of each interview ranged from 45 min to 1.5 h. All interviews  
7  
8 were recorded.  
9

### 10 ***Data analysis***

11  
12  
13 MAXQDA (version 11.0) was used to facilitate the data analysis. All interviews were  
14  
15 transcribed by the fourth author, and the quality of the transcription was  
16  
17 double-checked by the third author. The transcripts were coded and analyzed by the  
18  
19 second author. After careful and repeated examination of the transcripts, categories  
20  
21 and subcategories of analysis were developed. Totally 24 codes and 11 code families  
22  
23 were created. This made it easier to analyze by individual family code as well as  
24  
25 visualize the relations among codes in a network.<sup>14</sup> A constant comparative method  
26  
27 was employed to facilitate theme development, following recommended steps.<sup>15</sup> All  
28  
29 codes relevant to perceived risk factors were searched and results categories were  
30  
31 determined based on common themes across related codes. The coding strategy and  
32  
33 procedure were double-checked by the first author to reach a consensus on the results.  
34

### 35 **Results**

#### 36 ***Sample characteristics***

37  
38  
39  
40  
41 102 healthcare workers were approached. Two of them declined and 5 did not  
42  
43 complete the interview due to emergency medical cases that need them to deal with.  
44  
45 Table 1 summaries the demographic variables of the interviewees. The participants  
46  
47 included 95 medical workers, with 40 males and 55 females. Most interviewees were  
48  
49 doctors (65.3%). The participants from general hospitals (32.6%) were almost as  
50  
51 many as those from maternal and child health hospitals (33.7%). Maternal and child  
52  
53 health hospitals provide the majority of secondary care for children, with children's  
54  
55 hospitals offering tertiary care. Thus only one children's hospital served the  
56  
57 population were interviewed. As for professional level, most interviewees held senior  
58  
59  
60

levels (47.4%).

Table 1 Demographic characteristic of health professionals completed the in-depth interview

|                                    | Male<br>(n=40) | Female<br>(n=55) | Total<br>(n=95) | %    |
|------------------------------------|----------------|------------------|-----------------|------|
| <b>Province</b>                    |                |                  |                 |      |
| Zhejiang                           | 10             | 14               | 24              | 25.3 |
| Guangdong                          | 12             | 12               | 24              | 25.3 |
| Shanxi                             | 10             | 13               | 23              | 24.2 |
| Hunan                              | 8              | 16               | 24              | 25.3 |
| <b>Hospital level</b>              |                |                  |                 |      |
| General hospital                   | 11             | 20               | 31              | 32.6 |
| Children's hospital                | 1              | 1                | 2               | 2.1  |
| Maternal and child health hospital | 16             | 16               | 32              | 33.7 |
| Community health service Center    | 7              | 15               | 22              | 23.2 |
| Township hospital                  | 5              | 3                | 8               | 8.4  |
| <b>Occupational category</b>       |                |                  |                 |      |
| Doctors                            | 25             | 37               | 62              | 65.3 |
| Nurses                             | 0              | 9                | 9               | 9.5  |
| Managers                           | 15             | 9                | 24              | 25.3 |
| <b>Professional level</b>          |                |                  |                 |      |
| Senior                             | 20             | 25               | 45              | 47.4 |
| Intermediate                       | 14             | 18               | 32              | 33.7 |
| Primary                            | 6              | 12               | 18              | 18.9 |

### ***Risk factors for child maltreatment***

Analysis of the interview transcriptions yielded four primary themes relevant to risk factors for child maltreatment: (a) cultural factors; (b) social factors; (c) family factors; and (d) children's own factors. These four primary themes were divided into sub-themes to elucidate pertinent aspects (see Fig. 1).

(Insert Fig. 1 here)

#### **Cultural factors**

In Chinese traditional culture, parents have absolute authority over their children and children's disobedience is strictly forbidden. Under the influence of some typical Chinese traditional phrases, such as "Spare the rod and spoil the child", parents tend to beat their children at will.

Influenced by the utilitarian atmosphere, many parents keep up with the Joneses by setting unreasonable expectations and demands for their children, and physically punish their children if they fail to meet these expectations.

*Some parents' expectations for their children are too high. They feel disappointed if children failed to achieve, which causes physical abuse. (Community health worker, female, aged 28)*

The traditional preference for sons in China leads to maltreatment of girls, including physical abuse and neglect.

*People living in remote or mountainous areas prefer boys to girls. In these families, giving birth to girls is contrary to their expectation, which might resulting in neglect or abuse . (Doctor in child hospital, male, aged 35)*

#### **Social factors**

The pace of life in modern China is much faster than before, and some people

1  
2  
3  
4 bear heavy life stress as the society moves towards a highly commercial one. Parents  
5 at work have relatively limited time and patience to take care of their children.  
6  
7

8 *Most parents working in cities or farming in rural areas have limited time and*  
9 *energy [to accompany their children]. (Community health worker, female, aged 36)*  
10  
11  
12

13 Some children are left in the care of grandparents or other relatives when their  
14 parents migrate to the cities for work. These children are more likely to suffer from  
15 maltreatment.  
16  
17

18  
19  
20 *[In our village], most of them (children) are living with their grandparents, and*  
21 *comparatively can't be supervised effectively. (Community health worker, male, aged*  
22 *38)*  
23  
24  
25

## 26 **Family factors**

27

28  
29 Families' economic status may exert great impact on children's well-being.  
30 Child maltreatment happens relatively more frequently in families with poor  
31 economic conditions. Children of single parents or in combined families tend to be at  
32 greater risk of maltreatment.  
33  
34  
35  
36

37  
38 *Child maltreatment is related to economic conditions... One grandma [in my*  
39 *village] had no money and tried to relieve her stress by abusing the child. (Nurse in*  
40 *maternal and child health hospital, female, aged 32)*  
41  
42  
43

44  
45 *Sexual abuse might be committed by the stepfathers... Some stepmothers*  
46 *refuse to provide meals [for the children], and even beat them when their father is not*  
47 *at home. (Manager in maternal and child health, female, aged 45)*  
48  
49  
50

51  
52 Education also plays a large role. As some parents lack parenting skills, they  
53 think only physical punishment will make children more obedient.  
54  
55

56  
57 *Many of these parents believe children tend to remember what parents say after*  
58  
59  
60

1  
2  
3  
4 *being beat rather than reasoning. (Doctor in maternal and child health care center,*  
5 *male, aged 30)*  
6  
7

8 Maltreatment is more likely to be committed by parents suffering from mental  
9 health issues, and parents who experienced maltreatment themselves when they were  
10 young.  
11  
12

13  
14  
15 *As he [the father] was often physically punished at school age, he copies this*  
16 *behavior to his child now. (Nurse in child hospital, female, aged 35)*  
17  
18

### 19 **Children's own factors**

20  
21  
22 Children who are mischievous, bad-tempered or congenitally handicapped are  
23 more likely to suffer from maltreatment.  
24  
25

26  
27  
28 *Sometimes it's because the child is too naughty. They [the children] are also at*  
29 *risk of being maltreated if they have congenital defects. Another issue is the*  
30 *intelligence of children. (Hospital manager in maternal and child health care center,*  
31 *male, aged 41)*  
32  
33

34  
35  
36 Some interviewees mentioned that children's lack of self-protection awareness,  
37 and even being completely unaware of being maltreated, increases the risk of  
38 maltreatment.  
39  
40

41  
42  
43 Children of different genders are differently at risk for maltreatment. Girls are  
44 more likely to suffer from maltreatment, except when children have disabilities, in  
45 which case both genders are equally at risk.  
46  
47

48  
49  
50 *I think girls are more likely to suffer from sexual abuse and neglect than boys.*  
51  
52  
53 *For children with congenital defects, the possibilities for boys and girls are more or*  
54 *less the same. (Manager in community health care center, female, aged 40)*  
55  
56

### 57 **Discussion**

1  
2  
3  
4 Our study identified the risk factors of child maltreatment in China as perceived  
5 by health professionals. Given their unique relationship with children and families,  
6 health professionals should be alerted to risk factors that may suggest suspected cases.  
7 There is a direct association between the act of reporting cases and matters related to  
8 knowledge.<sup>16</sup> We found that in the view of Chinese health professionals, many factors  
9 might increase the risk of child maltreatment, including cultural, social, family factors  
10 and those of the child itself.  
11  
12  
13  
14  
15  
16  
17

18 Cultural factors are very important in understanding child abuse. In Chinese  
19 tradition, the experience of deliberately inflicted pain is regarded as  
20 character-building.<sup>17</sup> Chinese people seem to be less critical of the use of physical  
21 force by parents to accomplish desired ends.<sup>18</sup> The traditional value of filial piety  
22 (*Xiao*) gives parents absolute authority over their children. This is why children's  
23 disobedience toward parents is the most common reason for physical punishment.<sup>19</sup>  
24 Additionally, under the one-child policy launched in 1979, Parents tend to attach  
25 higher value and put greater expectations on children, and punish them once the  
26 expectations fail to be met.<sup>20</sup> Although in 2013 China announced the decision to relax  
27 the one-child policy and encourage families to have two children if one parent was an  
28 only child, tension between the child and parents caused by high expectations is still a  
29 risk factor of disciplinary punishment.  
30  
31  
32  
33  
34  
35  
36  
37  
38  
39  
40  
41

42 In China, conventional wisdom that sons are preferable to daughters is embedded  
43 within patrilineal family structures.<sup>21</sup> Although the inherent son preference is on  
44 decline, sons are still desired more frequently than daughters.<sup>22</sup> Deep-rooted  
45 Confucian values play a part.<sup>23</sup> In addition, with rapid economic development in  
46 China, the pace of life and stress on parents has increased, which negatively affect  
47 parenting practices.<sup>9</sup> The respondents have also recognized the children who are left  
48 behind when their parents go to work in cities. This is consistent with many studies  
49 exploring the influence of rural-to-urban labor migration.<sup>24</sup> With the processes of  
50 modernization and urbanization, many children are left behind, and should be given  
51  
52  
53  
54  
55  
56  
57  
58  
59  
60



1  
2  
3  
4 special attention.  
5

6 The interviewees perceived low family economic status as a risk factor, which  
7 can affect the parent-child relationships by limiting economic resources and  
8 increasing parents' stress levels.<sup>9</sup> Instances of single parent families and combined  
9 families have been increasing in China. The financial stresses of being a single parent,  
10 social stresses due to isolation and a lack of social support all play a part in the  
11 increased risk in single parent families.<sup>25</sup> When a single parent remarries, children  
12 may have difficulties in dealing with relationships with new family members, putting  
13 them at an increased risk of maltreatment. Previous studies reported a number of  
14 characteristics, including education level, lack of skills, patience or responsibility,  
15 were linked to child abuse. For example, parents with low education levels were  
16 reported in the literature to present a 5-fold increase in risk.<sup>25</sup> In another study, parents  
17 who were more likely to abuse children physically were found to have poor control of  
18 their impulses and mental health problems.<sup>26</sup> All this indicated the necessity of  
19 parenting skill education. Health professionals need to make effort to build  
20 harmonized parent-child relationship and happier family environment .  
21  
22  
23  
24  
25  
26  
27  
28  
29  
30  
31  
32  
33  
34  
35

36 It is clear that children are victims, and cannot be blamed for the maltreatment  
37 suffered. However, children with several characteristics are more prone to  
38 maltreatment, including curiousness of young age, physical or mental handicaps,  
39 premature birth or low-birth weight.<sup>25</sup> While health professionals didn't mention the  
40 latter two, they did identify poor awareness of self-protection and children's character.  
41 This indicates that some health professionals misunderstood the underlying reasons by  
42 blaming children instead of perpetrators, and show tolerance to maltreatment such as  
43 corporal punishment.  
44  
45  
46  
47  
48  
49  
50  
51

52 It has been a consensus that girls are at higher risk for sexual abuse, emotional  
53 abuse and neglect, whereas boys are more likely to be victims of physical abuse in  
54 many countries.<sup>8</sup> Wide cultural gaps exist between different societies and studies in  
55  
56  
57  
58  
59  
60

1  
2  
3  
4 China produced mixed findings, with boys being more likely to experience both  
5 physical and emotional abuse.<sup>9</sup> Boys may be at greater risk as they are perceived as  
6 inherently having greater responsibility for social obligations, support for parents and  
7 preserving family heritage.<sup>26</sup> However, health professionals failed to realize the risk  
8 of boys' abuse. Further research is still needed to validate the gender differences.  
9  
10  
11  
12

### 13 14 **Conclusion**

15  
16  
17 This study is an attempt to carry a step forward in terms of training health  
18 professionals in China. Training is required to increase knowledge of health  
19 professionals in order to help them understand the cause of child maltreatment and  
20 meet the qualifications to practice prevention and treatment of child maltreatment.  
21 The results of this study provide basis for developing targeted child maltreatment  
22 prevention training courses for health professionals. The results may also serve as a  
23 basis to develop appropriate interventions in areas with similar culture background.  
24  
25  
26  
27  
28  
29  
30

### 31 **Acknowledgement**

32  
33  
34 This study was accepted for oral presentation in the 2015 ISPCAN Asia Pacific  
35 Regional Conference on Child Abuse and Neglect. We are grateful to Ms. CaiYue and  
36 Chen Xuemei from UNICEF for providing technical support. We also thank all the  
37 health workers who participated in this study. We thank Ms. Margaux Schreurs and  
38 Mrs. Chunmei Lee for the help with editing the language.  
39  
40  
41  
42  
43  
44

### 45 **Contributors' Statement**

46  
47 The research design, data analysis and manuscript of this study were completed by  
48 TX and QY. The interview was completed by SW, YW, WL and XH. All authors  
49 approved the final manuscript as submitted and agree to be accountable for all aspects  
50 of the work.  
51  
52  
53  
54  
55

### 56 **Competing interests**

1  
2  
3  
4 None declared.  
5

## 6 **Funding**

7  
8  
9 The study was funded by UNICEF Beijing Office.  
10

## 11 **Data sharing statement**

12  
13  
14 The data set is the deidentified interview transcriptions of the 95 subjects (only in  
15 Chinese). Data is available on request from the corresponding author.  
16  
17

## 18 **References**

- 19  
20  
21  
22  
23  
24 1. World Health Organization. Child maltreatment. [http:// www.who.int/](http://www.who.int/mediacentre/factsheets/fs150/en/)  
25  
26 [mediacentre/ factsheets/fs150/en/](http://www.who.int/mediacentre/factsheets/fs150/en/).2014, WHO. Geneva.  
27  
28  
29 2. World Health Organization. Report of the Consultation on Child Abuse  
30  
31 Prevention. 1999, WHO. Geneva.  
32  
33  
34 3. World Health Organization & ISPCAN. Preventing child maltreatment: a guide to  
35  
36 taking action and generating evidence. 2006, WHO, Geneva.  
37  
38  
39 4. Kiser LJ, Stover CS, NavaltaCP, Dorado J, Vogel JM, Abdul-AdilJK, Kim S, Lee  
40  
41 RC, Vivrette R, Briggs EC. Effects of the child-perpetrator relationship on  
42  
43 mental health outcomes of child abuse: It's (not) all relative. *Child Abuse &*  
44  
45 *Neglect*, 2014; 38:1083-1093.  
46  
47  
48 5.Sidebotham P, Heron J; ALSPAC Study Team. Child maltreatment in the  
49  
50 "children of the nineties:" the role of the child. *Child Abuse Negl*, 2003;27:337-352.  
51  
52  
53  
54 6.Pietrantonio AM, Wright E, Gibson KN, Alldred T, Jacobson D, Niec A.Mandatory  
55  
56 reporting of child abuse and neglect: Crafting a positive process for health  
57  
58  
59

- professionals and caregivers. *Child Abuse & Neglect*, 2013;37:102-109.
7. Jui-Ying Feng, Murray Levine. Factors associated with nurses' intention to report child abuse: A national survey of Taiwanese nurses. *Child Abuse & Neglect*, 2005; 29:783–795.
8. Etienne G, Krug, Linda L. Dahlberg, James A. Mercy, Anthony B. Zwi, Rafael Lozano. *World report on violence and health*. 2002, WHO, Geneva.
9. Minli Liao, Alvin Shiulain Lee, Amelia C. Roberts-Lewis, Jun Sung Hong, Kaishan Jiao. Child maltreatment in China: An ecological review of the literature. *Children and Youth Services Review*, 2011;33:1709-1719.
10. Hesketh T, Hong ZS, Lynch MA. Child abuse in China: the views and experiences of child health professionals. *Child Abuse & Neglect*, 2000;24:867-872.
11. Xu Tao, Jiao Fuyong, Pan Jianping, Chen Jingqi, Huang Xiaoyan, Liu Wenli, Gong Limin, Wang Huishan. A systematic literature review of child maltreatment in China (in Chinese). *Chinese journal of child health care*, 2014;22: 972-975.
12. Li X, Yue Q, Wang S, Wang H, Jiang J, Gong L, Liu W, Huang X, Xu T. Knowledge, attitudes, and behaviours of healthcare professionals regarding child maltreatment in China. *Child Care Health Dev*. 2017;1-7.
13. Wekerle C. Resilience in the context of child maltreatment: Connections to practice. *Child Abuse & Neglect*, 2013;37:93-101.
14. Li L, Sun S, Wu Z, Wu S, Lin C, Yan Z. Disclosure of HIV status is a family matter: field notes from China. *J Fam Psychol*, 2007;21:307-314.
15. Dye JF, Schatz I M, Rosenberg BA, & Coleman S T. Constant comparison

1  
2  
3  
4 method: A kaleidoscope of data. *Practicing Qualitative Research*. 2000.

5  
6 16. Moreira GA, Vieira LJ, Deslandes SF, Pordeus MA, Gama Ida S, Brilhante AV.

7  
8 Factors associated with the report and adolescent abuse in primary healthcare.

9  
10  
11 *CienSaude Colet*, 2014;19:4267-4276.

12  
13  
14 17. Wu DYH. Child abuse in Taiwan. In J. E. Korbin (Ed.), *Child abuse and neglect: Cross-cultural perspectives*. Berkeley, CA: University of California Press. 1981;139–  
15  
16  
17  
18 165.

19  
20  
21 18. George K. HONG, Lawrence K. HONG. Comparative perspectives on child abuse  
22  
23 and neglect: Chinese versus Hispanics and Whites. *Child Welfare*, 1991;70:463-475.

24  
25  
26 19. Leung PW, Wong WC, Chen WQ, Tang CS. Prevalence and determinants of child  
27  
28 maltreatment among high school students in Southern China: A large-scale  
29  
30 school based survey. *Child and Adolescent Psychiatry and Mental Health*,  
31  
32 2008;2:27-48.

33  
34  
35 20. Hua J, Mu Z, Nwaru BI, Gu G, Meng W, Wu Z. Child neglect in one-child  
36  
37 families from Suzhou City of mainland China. *BMC Int Health Hum Rights*,  
38  
39 2014;14:8.

40  
41  
42 21. Murphy R, Tao R, Lu X. Son preference in rural China: patrilineal families and  
43  
44 socioeconomic change. *Popul Dev Rev*, 2011;37:665-690.

45  
46  
47 22. Zhou C, Wang XL, Zhou XD, Hesketh T. Son preference and sex-selective  
48  
49 abortion in China: informing policy options. *Int J Public Health*, 2012;57: 459-465.

50  
51  
52 23. Das Gupta M, Jiang L, Xie Z, Li B, Woojin C, Bae H. Why is son preference so  
53  
54 persistent in East and South Asia? A cross-country study of China, India and the  
55  
56 Republic of Korea. *J Dev Stud*, 2003; 40:153–187.

- 1  
2  
3  
4 24. Wang X, Ling L, Su H, Cheng J, Jin L, Sun YH. Self-concept of left-behind  
5 children in China: a systematic review of the literature. *Child Care Health Dev*,  
6 2015;41(3):346-55.  
7  
8  
9  
10 25. Sidebotham P, Heron J; ALSPAC Study Team. Child maltreatment in the  
11  
12 “children of the nineties”: A cohort study of risk factors. *Child Abuse Negl*, 2006;30:  
13 497-522.  
14  
15  
16  
17  
18 26. Klevens J, Bayón MC, Sierra M. Risk factors and context of men who  
19 physically abuse in Bogotá, Colombia. *Child Abuse Negl*, 2000;24:323-332.  
20  
21  
22  
23  
24  
25  
26  
27  
28  
29  
30  
31  
32  
33  
34  
35  
36  
37  
38  
39  
40  
41  
42  
43  
44  
45  
46  
47  
48  
49  
50  
51  
52  
53  
54  
55  
56  
57  
58  
59  
60

Figure 1 Primary themes with sub-themes summarized on the perceived risk factors  
for child maltreatment

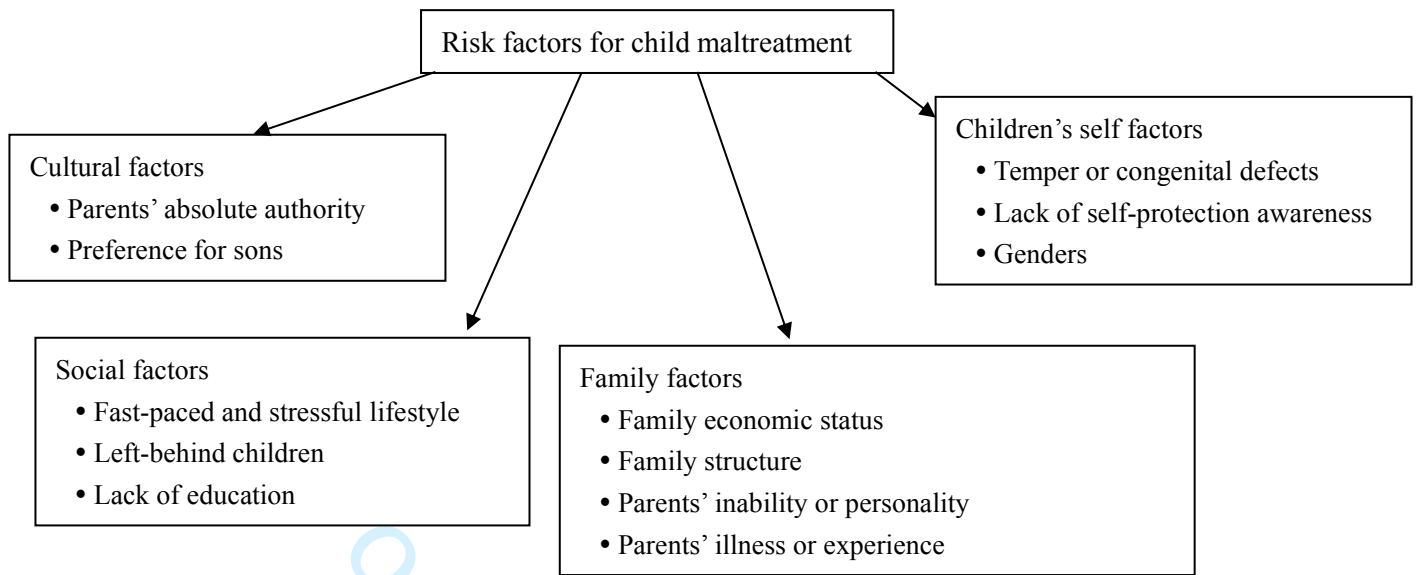

Figure 1 Primary themes with sub-themes summarized on the perceived risk factors for child maltreatment

# Standards for Reporting Qualitative Research (SRQR)\*

Page/line no(s).

## Title and abstract

|                                                                                                                                                                                                                                                              |                      |
|--------------------------------------------------------------------------------------------------------------------------------------------------------------------------------------------------------------------------------------------------------------|----------------------|
| <p><b>Title</b> - Concise description of the nature and topic of the study Identifying the study as qualitative or indicating the approach (e.g., ethnography, grounded theory) or data collection methods (e.g., interview, focus group) is recommended</p> | <p>Page 1 line 1</p> |
| <p><b>Abstract</b> - Summary of key elements of the study using the abstract format of the intended publication; typically includes background, purpose, methods, results, and conclusions</p>                                                               | <p>Page 2</p>        |

## Introduction

|                                                                                                                                                                     |                                            |
|---------------------------------------------------------------------------------------------------------------------------------------------------------------------|--------------------------------------------|
| <p><b>Problem formulation</b> - Description and significance of the problem/phenomenon studied; review of relevant theory and empirical work; problem statement</p> | <p>Page 3 line 10-30; page 4 line 1-11</p> |
| <p><b>Purpose or research question</b> - Purpose of the study and specific objectives or questions</p>                                                              | <p>Page 4 line 14-16</p>                   |

## Methods

|                                                                                                                                                                                                                                                                                                                                                                                                             |                                         |
|-------------------------------------------------------------------------------------------------------------------------------------------------------------------------------------------------------------------------------------------------------------------------------------------------------------------------------------------------------------------------------------------------------------|-----------------------------------------|
| <p><b>Qualitative approach and research paradigm</b> - Qualitative approach (e.g., ethnography, grounded theory, case study, phenomenology, narrative research) and guiding theory if appropriate; identifying the research paradigm (e.g., postpositivist, constructivist/ interpretivist) is also recommended; rationale**</p>                                                                            | <p>Page 5 line 11-12</p>                |
| <p><b>Researcher characteristics and reflexivity</b> - Researchers' characteristics that may influence the research, including personal attributes, qualifications/experience, relationship with participants, assumptions, and/or presuppositions; potential or actual interaction between researchers' characteristics and the research questions, approach, methods, results, and/or transferability</p> | <p>Page 5 line 16</p>                   |
| <p><b>Context</b> - Setting/site and salient contextual factors; rationale**</p>                                                                                                                                                                                                                                                                                                                            | <p>Page 4 line 19-28</p>                |
| <p><b>Sampling strategy</b> - How and why research participants, documents, or events were selected; criteria for deciding when no further sampling was necessary (e.g., sampling saturation); rationale**</p>                                                                                                                                                                                              | <p>Page 4 line 30, page 5 line 1-7</p>  |
| <p><b>Ethical issues pertaining to human subjects</b> - Documentation of approval by an appropriate ethics review board and participant consent, or explanation for lack thereof; other confidentiality and data security issues</p>                                                                                                                                                                        | <p>Page 4 line 26-28, page 5 line 9</p> |
| <p><b>Data collection methods</b> - Types of data collected; details of data collection procedures including (as appropriate) start and stop dates of data collection and analysis, iterative process, triangulation of sources/methods, and modification of procedures in response to evolving study findings; rationale**</p>                                                                             | <p>Page 5 line 11-17</p>                |



|    |                                                                                                                                                                 |                   |
|----|-----------------------------------------------------------------------------------------------------------------------------------------------------------------|-------------------|
| 1  |                                                                                                                                                                 |                   |
| 2  |                                                                                                                                                                 |                   |
| 3  | <b>Data collection instruments and technologies</b> - Description of instruments (e.g.,                                                                         | Page 5 line 11-17 |
| 4  | interview guides, questionnaires) and devices (e.g., audio recorders) used for data collection; if/how the instrument(s) changed over the course of the study   |                   |
| 5  |                                                                                                                                                                 |                   |
| 6  |                                                                                                                                                                 |                   |
| 7  | <b>Units of study</b> - Number and relevant characteristics of participants, documents,                                                                         | Page 6 line 1-9   |
| 8  | or events included in the study; level of participation (could be reported in results)                                                                          |                   |
| 9  |                                                                                                                                                                 |                   |
| 10 | <b>Data processing</b> - Methods for processing data prior to and during analysis,                                                                              | Page 5 line 19-21 |
| 11 | including transcription, data entry, data management and security, verification of data integrity, data coding, and anonymization/de-identification of excerpts |                   |
| 12 |                                                                                                                                                                 |                   |
| 13 | <b>Data analysis</b> - Process by which inferences, themes, etc., were identified and                                                                           | Page 5 line 22-29 |
| 14 | developed, including the researchers involved in data analysis; usually references a specific paradigm or approach; rationale**                                 |                   |
| 15 |                                                                                                                                                                 |                   |
| 16 |                                                                                                                                                                 |                   |
| 17 | <b>Techniques to enhance trustworthiness</b> - Techniques to enhance trustworthiness                                                                            | Page 5 line 22-29 |
| 18 | and credibility of data analysis (e.g., member checking, audit trail, triangulation);                                                                           |                   |
| 19 | rationale**                                                                                                                                                     |                   |
| 20 |                                                                                                                                                                 |                   |

## Results/findings

|    |                                                                                             |               |
|----|---------------------------------------------------------------------------------------------|---------------|
| 21 |                                                                                             |               |
| 22 |                                                                                             |               |
| 23 | <b>Synthesis and interpretation</b> - Main findings (e.g., interpretations, inferences, and | Page 6-page 9 |
| 24 | themes); might include development of a theory or model, or integration with                |               |
| 25 | prior research or theory                                                                    |               |
| 26 |                                                                                             |               |
| 27 | <b>Links to empirical data</b> - Evidence (e.g., quotes, field notes, text excerpts,        | Page 6-page 9 |
| 28 | photographs) to substantiate analytic findings                                              |               |
| 29 |                                                                                             |               |

## Discussion

|    |                                                                                           |                |
|----|-------------------------------------------------------------------------------------------|----------------|
| 30 |                                                                                           |                |
| 31 |                                                                                           |                |
| 32 | <b>Integration with prior work, implications, transferability, and contribution(s) to</b> | Page 9-page 11 |
| 33 | <b>the field</b> - Short summary of main findings; explanation of how findings and        |                |
| 34 | conclusions connect to, support, elaborate on, or challenge conclusions of earlier        |                |
| 35 | scholarship; discussion of scope of application/generalizability; identification of       |                |
| 36 | unique contribution(s) to scholarship in a discipline or field                            |                |
| 37 |                                                                                           |                |
| 38 | <b>Limitations</b> - Trustworthiness and limitations of findings                          |                |
| 39 |                                                                                           |                |

## Other

|    |                                                                                            |                 |
|----|--------------------------------------------------------------------------------------------|-----------------|
| 40 |                                                                                            |                 |
| 41 |                                                                                            |                 |
| 42 | <b>Conflicts of interest</b> - Potential sources of influence or perceived influence on    | Page 12 line 12 |
| 43 | study conduct and conclusions; how these were managed                                      |                 |
| 44 |                                                                                            |                 |
| 45 | <b>Funding</b> - Sources of funding and other support; role of funders in data collection, | Page 13 line 7  |
| 46 | interpretation, and reporting                                                              |                 |
| 47 |                                                                                            |                 |

\*The authors created the SRQR by searching the literature to identify guidelines, reporting standards, and critical appraisal criteria for qualitative research; reviewing the reference lists of retrieved sources; and contacting experts to gain feedback. The SRQR aims to improve the transparency of all aspects of qualitative research by providing clear standards for reporting qualitative research.

1  
2  
3  
4  
5  
6  
7  
8  
9  
10  
11  
12  
13  
14  
15  
16  
17  
18  
19  
20  
21  
22  
23  
24  
25  
26  
27  
28  
29  
30  
31  
32  
33  
34  
35  
36  
37  
38  
39  
40  
41  
42  
43  
44  
45  
46  
47  
48  
49  
50  
51  
52  
53  
54  
55  
56  
57  
58  
59  
60

\*\*The rationale should briefly discuss the justification for choosing that theory, approach, method, or technique rather than other options available, the assumptions and limitations implicit in those choices, and how those choices influence study conclusions and transferability. As appropriate, the rationale for several items might be discussed together.

**Reference:**

O'Brien BC, Harris IB, Beckman TJ, Reed DA, Cook DA. **Standards for reporting qualitative research: a synthesis of recommendations.** *Academic Medicine*, Vol. 89, No. 9 / Sept 2014  
DOI: 10.1097/ACM.0000000000000388

For peer review only
